1 **High nucleotide substitution rates associated with retrotransposon proliferation drive**

2 **dynamic secretome evolution in smut pathogens**

3

4 Depotter JRL<sup>a</sup>, Ökmen B<sup>a</sup>, Ebert MK<sup>a</sup>, Beckers J<sup>a</sup>, Kruse J<sup>bc</sup>, Thines M<sup>bc</sup>, Doehlemann G<sup>a\*</sup>

5

6 <sup>a</sup>University of Cologne, CEPLAS, Institute for Plant Sciences, Cologne, Germany

7 <sup>b</sup>Senckenberg Biodiversity and Climate Research Centre (BiK-F), Frankfurt a. M., Germany.

8 <sup>c</sup>Institute of Ecology, Evolution and Diversity, Goethe University Frankfurt, Frankfurt a. M.,

9 Germany.

10

11 \*Corresponding author

12 E-mail: [g.doehlemann@uni-koeln.de](mailto:g.doehlemann@uni-koeln.de) (GD)

13

14 **Abstract**

15 Transposable elements (TEs) play a pivotal role in shaping diversity in eukaryotic genomes.  
16 The covered smut pathogen on barley, *Ustilago hordei*, encountered a recent genome  
17 expansion. Using long reads, we assembled genomes of 6 *U. hordei* strains and 3 sister  
18 species, to study this genome expansion. We found that larger genome sizes can mainly be  
19 attributed to a higher genome fraction of long terminal repeat retrotransposons (LTR-RTs). In  
20 the studied smut genomes, LTR-RTs fractions are the largest in *U. hordei* and are positively  
21 correlated to the mating-type locus sizes, which is up to ~560 kb in *U. hordei*. Furthermore,  
22 LTR-RTs were found to be associated with higher nucleotide substitution levels, as these  
23 higher levels occur more clustered in smut species with a recent LTR-RT proliferation.  
24 Moreover, genes in genome regions with higher nucleotide substitution levels generally  
25 reside closer to LTR-RTs than other genome regions. Genome regions with many nucleotide  
26 substitutions encountered an especially high fraction of CG substitutions, which is not  
27 observed for LTR-RT sequences. The high nucleotide substitution levels particularly  
28 accelerate the evolution of secretome genes, as their more flexible nature results that  
29 substitutions often lead to amino acid alterations.

30 **Importance**

31 Genomic alteration can be generated through various means, in which transposable elements  
32 (TEs) can play a pivotal role. Their mobility causes mutagenesis in itself and can disrupt the  
33 function of the sequences they insert into. Indirectly, they also impact genome evolution as  
34 their repetitive nature facilitates non-homologous recombination. Furthermore, TEs have  
35 been linked to specific epigenetic genome organizations. We report a recent TE proliferation  
36 in the genome of the barley covered smut fungus, *Ustilago hordei*. This proliferation is  
37 associated with a distinct nucleotide substitution regime that has a higher rate and a higher  
38 fraction of CG substitutions. This different regime shapes the evolution of genes in subjected  
39 genome regions. Our findings highlight that TEs may influence the error-rate of DNA  
40 polymerase in a hitherto unknown fashion.

41

42 **Key words:** *Ustilago*, transposable element, genome expansion, DNA polymerase, mating-  
43 type locus

## 44 INTRODUCTION

45 Transposable elements (TEs) play a pivotal role in the genome evolution of eukaryotic  
46 organisms, including fungi (1). Fungal genomes can vary considerably in size, which is often  
47 determined by the extent and recency of TE proliferations (2, 3). On one side of the spectrum,  
48 Microsporidia, a diverse group of obligate intracellular parasitic fungi, contain members with  
49 extremely small genomes down to 2.3Mb that lack TEs (4, 5). In contrast, rust plant  
50 pathogens from the order Pucciniales contain members with genome sizes that are among the  
51 largest in the fungal kingdom (6, 7). For instance, the wheat stripe rust pathogen *Puccinia*  
52 *striiformis* f.sp. *tritici* has an estimated genome size of 135 Mb, which more than half consists  
53 of TE sequences (8). Mutations caused by TE transposition predominantly have a neutral or  
54 negative impact, but in particular cases they can also improve fungal fitness (3, 9). For plant  
55 pathogenic fungi, TE transposition can be a source of mutagenesis to evade host immunity  
56 and/or lead to an optimized host interaction (10). TEs can also passively contribute to  
57 mutagenesis, as their transpositions increase homologous genome sequences that are prone to  
58 ectopic recombination (11, 12). Pathogens evolve by host jumps, radiation and subsequent  
59 arms races with their hosts (13), in which the latter attempts to detect pathogen ingress  
60 through the recognition of so-called invasion patterns (14). One invasion pattern that is  
61 typically detected are effectors, i.e. secreted proteins that facilitate host colonization (15). To  
62 quickly adapt to effector-triggered immunity and yet continue host symbiosis, effector genes  
63 often reside in genome regions that facilitate mutagenesis (13, 16), such as those rich in TEs  
64 (17). TE-rich genome regions may not only encounter higher mutation rates, but may also  
65 have a higher chance to fix mutations due to their functionally more accessory nature (18).

66 TEs are a diverse group of mobile nucleotide sequences that are categorized into two  
67 classes (1). Class I comprises retrotransposons that transpose through the reverse  
68 transcription of their messenger RNA (mRNA). Class II are DNA transposons that transpose

69 without mRNA intermediate. TEs are then further classified based on their sequence structure  
70 (19). Retrotransposons with direct repeats at each end of their sequence are long terminal  
71 repeat retrotransposons (LTR-RTs) (20). LTR-RTs can encode the structural and enzymatic  
72 machinery for autonomous transposition. However, they may lose this ability through  
73 mutagenesis, but still be able to transpose using proteins of other TEs (21). LTR-RTs can  
74 then be further classified into superfamilies including *Copia* and *Gypsy*, which differ in the  
75 order of their reverse transcriptase and their integrase domain (19).

76 Smut fungi are a diverse group of plant pathogenic, hemibiotrophic basidiomycetes of  
77 which many infect monocot plants, in particular grasses. They live saprophytically as yeasts  
78 and mate in order to switch to the diploid, filamentous stage that enables them to infect their  
79 host (22). Smut pathogens are very host-specific and generally have small genomes in  
80 comparison to other plant pathogens (23, 24). The corn smut species *Ustilago maydis* and  
81 *Sporisorium reilianum* are closely related and have genome sizes of 19.8 Mb and 18.4 Mb,  
82 respectively (25, 26). This is partly due to their low level of repetitive sequences, including  
83 TEs. In total, only 2.1 and 0.5% of the genome consists of TEs for the *U. maydis* and *S.*  
84 *reilianum*, respectively (27). The covered smut pathogen of barley, *Ustilago hordei*, and the  
85 Brachipodieae grass smut, *U. brachipodii-distachyi*, are two related smut fungi and have  
86 genome assemblies of 21.15 Mb and 20.5 Mb, respectively (27, 28). These larger genome  
87 assembly sizes correlate to their higher TE content, which is 11.8% and 14.3% for *U. hordei*  
88 and *U. brachipodii-distachyi*, respectively (27). The assembled genome of *U. brachipodii-*  
89 *distachyi* is originally published under the species name *U. bromivora* (27). *U. brachipodii-*  
90 *distachyi* infects members from the tribe Brachipodieae, whereas *U. bromivora* affects  
91 bromes from the supertribe Triticoideae (29, 30). Considering the host specific nature of smut  
92 pathogens, we prefer to refer to this assembly as *U. brachipodii-distachyi* instead of *U.*  
93 *bromivora*, as the assembled strain infects *Brachypodium* species (27, 29).

94 Mating in grass-parasitic smut fungi is tetrapolar in *U. maydis* and *S. reilianum*,  
95 whereas *U. hordei* and *U. brachipodii-distachyi* have a bipolar mating system. In the bipolar  
96 system, there is one mating-type locus where recombination is suppressed (27, 31, 32). This  
97 locus is flanked by the *a* locus, which contains pheromone/receptor genes, and the *b* locus,  
98 which encodes the two homeodomain proteins bEast and bWest (33, 34). In the bipolar  
99 mating-type system, there are two mating-type alleles, *MAT-1* and *MAT-2*, which are in *U.*  
100 *hordei* ~500kb and ~430kb in size, respectively (32). A large fraction of the mating-type loci  
101 consists of repetitive sequences, i.e. ~45% repeats for *U. hordei* (28, 35). In contrast, the  
102 tetrapolar smuts, *U. maydis* and *S. reilianum*, have their *a* and *b* loci on different  
103 chromosomes causing them to segregate independently during meiosis (26, 31).

104 Recently, the complete genome of the reference *U. hordei* strain Uh364 was re-  
105 sequenced using the long-read PacBio technology and, instead of the previous 21.15 Mb  
106 assembly (28), a 27.1 Mb assembly was obtained (36). Thus, the *U. hordei* genome  
107 underwent a genome expansion as it is significantly larger than other sequenced smut species  
108 (27). This finding triggered us to study the *U. hordei* genome more in depth and use recently  
109 developed long-read sequencing technologies to unravel how its genome recently expanded.

## 110 **Results**

### 111 **LTR-RTs is an important determinant for *U. hordei* genome size**

112 To study the expansion in genome size of *U. hordei*, we sequenced and assembled 6 *U.*  
113 *hordei* strains of different geographic origins (Figure S1). Five contained a *MAT-1* locus and  
114 one (Uh1278) a *MAT-2*. The assemblies were composed of 23-46 contigs and ranged from  
115 25.8-27.2 Mb in size (Table 1). Strain Uh805 was assembled into 23 contigs that are  
116 homologous to the 23 chromosomes of *U. brachipodii-distachyi* indicating that inter-  
117 chromosomal rearrangements did not occur during the divergence of these two species (27).  
118 *MAT-1* loci, regions between and including the *a* and *b* loci, ranged from 536 to 564 kb in  
119 size, whereas the *MAT-2* locus was 472 kb (Table S1). In the *U. hordei* genome assemblies,  
120 class I TE sequences are over 6 times more abundant than class II TE sequences (Table 1,  
121 S2). More than 90% of the class I TEs consist of LTR-RTs, which is a total sequence amount  
122 ranging between 4,326 and 5,272 kb (Table 1). The number of LTR-RT sequences is  
123 positively correlated to the assembly sizes ( $r = 0.94$ ,  $p$ -value = 0.0051). Moreover, using  
124 strain Uh805 as a reference, 56-79% of the differences in assembly size with other strains can  
125 be attributed to differences in LTR-RT content. Thus, the variation in genome size between  
126 *U. hordei* strains can largely be attributed to intraspecific differences in LTR-RT proliferation  
127 and/or retention. More than 75% of the mating-type loci consist of repetitive sequences and  
128 over 29% are classified as LTR-RTs. The *MAT-1* and *MAT-2* loci and their flanking regions  
129 only have 27% one-to-one best homology to each other (Figure 1A), which is mainly due to  
130 mating-type specific repeats as only 6% of the repeats are shared between the two mating  
131 types. In contrast, 41 of the 47 expressed mating-type locus genes are shared between the two  
132 alleles (Figure 1B). Homologous recombination is suppressed in the mating-type region,  
133 which makes that TE transpositions within these regions are by definition mating-type  
134 specific (Figure 1B) (32).

135 **Table 1. Genome statistics of various smut genome assemblies.**

| Species                        | <i>U. hordei</i> |       |       |       |        |        | <i>U. nuda</i> | <i>U. brachipodii-<br/>distachyi(27)</i> | <i>U. tritici</i> | <i>U. lolicola</i> | <i>U. maydis(25)</i> | <i>S. reilianum(37,<br/>38)</i> |
|--------------------------------|------------------|-------|-------|-------|--------|--------|----------------|------------------------------------------|-------------------|--------------------|----------------------|---------------------------------|
| Strain                         | Uh359            | Uh805 | Uh811 | Uh818 | Uh1273 | Uh1278 | DE_29490       | UB2112                                   | Ut_3              | Us_530             | 521                  | SRS1_H2-8                       |
| Assembly size (Mb)             | 27.0             | 25.8  | 26.2  | 26.2  | 27.2   | 26.6   | 21.4           | 20.4                                     | 20.4              | 20.8               | 19.7                 | 18.5                            |
| Contigs                        | 46               | 23    | 26    | 25    | 37     | 27     | 31             | 23                                       | 32                | 41                 | 27                   | 23                              |
| BUSCOs (%)                     | 98.9             | 98.9  | 98.9  | 98.9  | 98.6   | 99.0   | 98.9           | 99.1                                     | 98.9              | 98.8               | 98.8                 | 98.5                            |
| Telomers*                      | 14               | 22    | 19    | 20    | 23     | 23     | 45             | 37                                       | 47                | 43                 | 1                    | 0                               |
| Total repeats (%)              | 38.2             | 35.3  | 36.4  | 36.5  | 38.9   | 36.0   | 22.6           | 17.0                                     | 16.4              | 8.9                | 4.6                  | 3.6                             |
| Class I TEs (kb) <sup>§</sup>  | 5,625            | 4,611 | 4,985 | 4,897 | 5,663  | 4,940  | 1,786          | 672                                      | 739               | 102                | 199                  | 5                               |
| LTR (kb)                       | 5,272            | 4,326 | 4,615 | 4,549 | 5,208  | 4,607  | 1,537          | 463                                      | 462               | 9                  | 185                  | 5                               |
| Gypsy (kb)                     | 2,066            | 1,688 | 1,679 | 1,653 | 2,225  | 1,873  | 484            | 144                                      | 127               | 3                  | 4                    | 3                               |
| Copia (kb)                     | 2,732            | 2,331 | 2,561 | 2,554 | 2,587  | 2,531  | 1,1019         | 292                                      | 289               | 6                  | 182                  | 1                               |
| Class II TEs (kb) <sup>§</sup> | 781              | 746   | 708   | 791   | 731    | 692    | 395            | 473                                      | 285               | 482                | 5                    | 103                             |

136 <sup>§</sup> Only repetitive sequences that were larger than 500 bp were classified.

137 \* “TAACCC” or “GGGTTA” repeats at the end of a contig



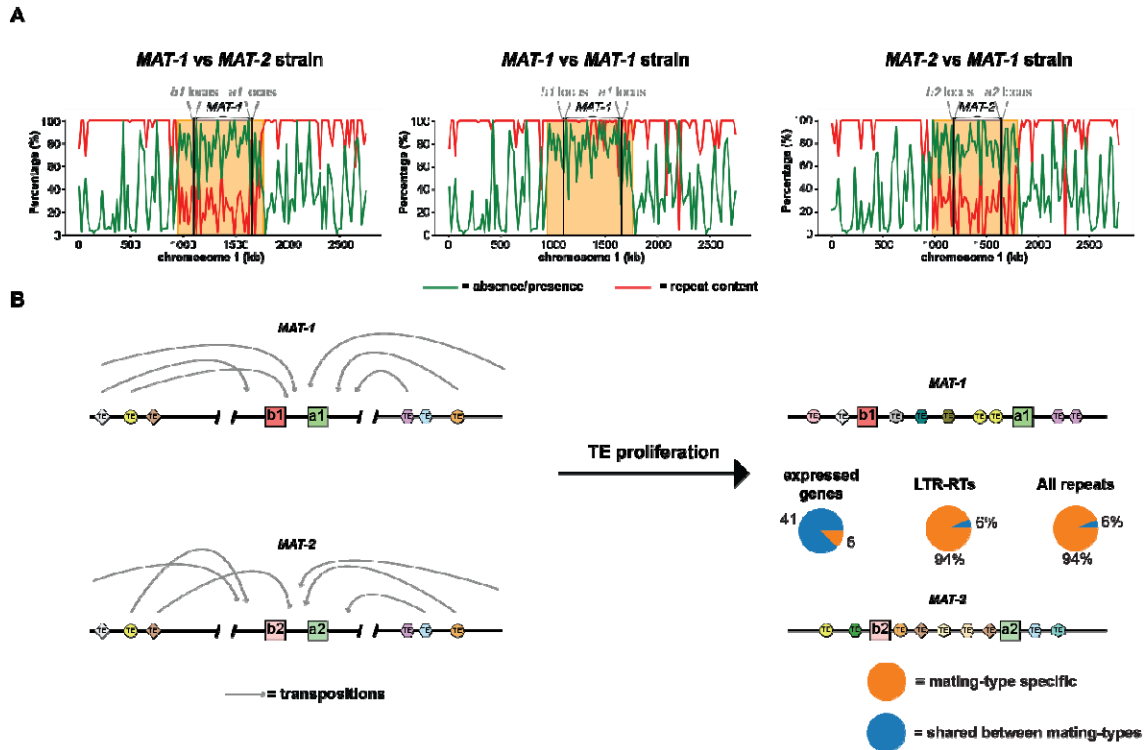

138

139 **Figure 1: The mating-type specificity of *MAT-1* and *MAT-2* loci sequences.** (A) As references, the *MAT-1*  
 140 strain Uh805 and the *MAT-2* strain Uh1278 were used. Repeat content and presence/absence polymorphisms  
 141 were calculated for 20 kb windows. Presence-absence polymorphisms were determined between the *MAT-1* and  
 142 *MAT-2* reference strains, in addition to the *MAT-1* strains Uh805 and Uh811. The orange squares encompass the  
 143 mating-type loci and indicate genome regions where the repeat contents are high and sequences are generally  
 144 mating-type specific. (B) Model that explains the mating-type specificity of sequences within and flanking the  
 145 mating-type loci. The absence of recombination within the mating-type loci and their flanking regions makes  
 146 that transpositions within these regions become mating-type specific.

147

148 ***The U. hordei* secretome is activated upon plant colonization, whereas LTR-RTs are**  
 149 **generally inactive**

150 To study gene and LTR-RT expression, RNA-seq was done from from *U. hordei* grown in  
 151 liquid medium, and in barley leaves at 3 days post infection. In total, 6229 of the 7704 (81%)  
 152 predicted gene loci in Uh803 were expressed in either of the two *U. hordei* growth  
 153 conditions, whereas only 27 of the 904 (3%) LTR-RTs displayed expression (Figure 2B).

154 Moreover, only 7 of the expressed LTR-RTs displayed expression in more than half of their  
155 sequence. Of these 7, there was one *Copia* and one *Gypsy* LTR-RT that can be autonomous,  
156 as functional domains for aspartyl protease, reverse transcriptase and integrase could be  
157 identified. In conclusion, almost all LTR-RT sequences were inactive in the two tested  
158 environmental conditions. For the genes, 558 (9%) were upregulated *in planta*, whereas 419  
159 (7%) were downregulated (Figure 2). Up- and downregulated genes were screened for Gene  
160 Ontology (GO) term enrichments, to see which biological processes are affected by plant  
161 colonization. In total, 14 and 3 GO terms were enriched in *in planta* up- and down-regulated  
162 genes, respectively (Figure 2). Generally, processes associated with the fungal membrane,  
163 including transmembrane transport were upregulated *in planta*. In correspondence with these  
164 results, 165 of the 558 genes upregulated *in planta* encode secreted proteins. Thus, 45%  
165 (165/369) of the expressed genes that encode secreted proteins were upregulated *in planta*,  
166 which is a significant enrichment (Fisher exact test,  $p$ -value =  $1.87e-83$ ) (Figure 2). In  
167 contrast, only 6% of the genes encoding a secreted protein were downregulated. Of these  
168 downregulated genes, 35% (7/20) was predicted to have a carbohydrate-active (CAZyme)  
169 function, whereas this was 18% (29/165) for *in planta* upregulated secretome genes. Thus,  
170 the *U. hordei* transmembrane transport system and secretome genes are strongly activated  
171 upon plant colonization, whereas hardly any LTR-RTs display expression. In total, 24%  
172 (median) of the 20kb flanking regions secretome genes consist of repeats, which is the same  
173 for non-secretome genes (t-test,  $p$ -value = 0.51) (Figure S2). Secretome genes upregulated *in*  
174 *planta* have a median of 21%, which is not significantly lower than non-secretome genes (t-  
175 test,  $p$ -value > 0.01). Thus, in contrast to some other filamentous plant pathogens (17),  
176 secretome genes are not especially associated with repeat-rich genome regions in *U. hordei*.

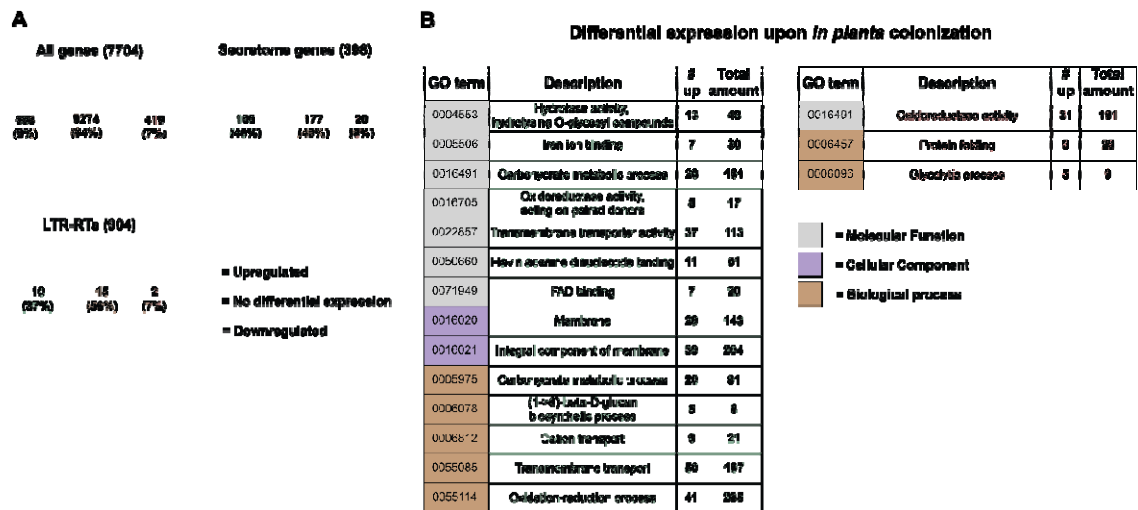

177

178 **Figure 2. Differential expression of *U. hordei* loci upon plant colonization.** (A) Comparison of *U. hordei*  
179 locus expression between growth in liquid culture medium and *in planta*. The numbers between brackets  
180 indicate how many genes and LTR-RTs have been annotated in the genome. The significance of differential  
181 expression was calculated using a threshold of log2-fold-change. (B) Gene Ontology (GO) term enrichments in  
182 differently regulated *Ustilago hordei* genes. In green and red are GO terms that are enriched in *in planta* up- and  
183 down-regulated genes, respectively. *p*-values were calculated with the Fisher's exact test. For the whole figure  
184 significance was determined with a *p*-value < 0.01 and corrected for multiple-testing with the Benjamini-  
185 Hochberg method.

186

### 187 Higher LTR-RT contents in genomes of smuts with a bipolar mating-type system

188 As LTR-RTs played a predominant role in the genome expansion of *U. hordei*, we also  
189 studied the impact of TE dynamics on the genome evolution of *U. hordei* sister species. We  
190 sequenced genomes of *Ustilago nuda*, *Ustilago tritici* and *Ustilago loliicola*, which are smut  
191 species that are close relatives of *U. hordei* and *U. brachipodii-distachyi* (29, 39). Assemblies  
192 of 21.4, 20.8 and 20.4 Mb were obtained in 31, 41 and 32 contigs for *U. nuda*, *U. loliicola*  
193 and *U. tritici*, respectively (Table 1). A phylogenetic tree was constructed, which included the  
194 newly sequenced species as well as *U. brachipodii-distachyi*, *U. maydis* and *S. reilianum*  
195 (Figure 3) (25, 27, 37, 38). *U. hordei*, *U. nuda*, *U. brachipodii-distachyi* and *U. tritici* cluster  
196 together with *U. loliicola* being the closest outgroup species. Within the cluster, *U. hordei*

197 diverged the most recently from *U. nuda*, which also infects *Hordeum* species (Figure 3).  
198 Synteny between the different contigs was also investigated and the ancestral gene order  
199 reconstructed. *S. reilianum* and *U. loliicola* do not have inter-chromosomal rearrangement in  
200 comparison to their reconstructed last common ancestor (Figure 3). The *U. maydis* genome  
201 has one inter-chromosomal rearrangement with respect to its last common ancestor with *S.*  
202 *reilianum*. *U. hordei*, *U. nuda*, *U. brachipodii-distachyi* and *U. tritici* share one inter-  
203 chromosomal rearrangement that occurred after their divergence from *U. loliicola* (Figure 3).  
204 As previously reported, this rearrangement resulted in the mating-type polarity switch from  
205 tetrapolar to bipolar due to the linkage of the *a* and *b* mating-type loci (31). This inter-  
206 chromosomal rearrangement is the only one observed in the assemblies of *U. brachipodii-*  
207 *distachyi*, *U. nuda* and *U. hordei*, whereas the *U. tritici* assembly has one additional inter-  
208 chromosomal rearrangement. The smut species with a bipolar mating-type generally have a  
209 higher repeat content (16.4-38.9%), than the tetrapolar ones (3.6-8.9%) (Table 1). This  
210 increase in repeat content can largely be attributed to LTR-RT sequences, which comprise  
211 4,326 kb in *U. hordei* (Uh805) in contrast to only 5 kb for *S. reilianum* (Table 1). Thus,  
212 repeats have increased after the polarity switch, mainly due to higher LTR-RT contents.  
213 Furthermore, repeat and the LTR-RT contents of smut genomes with a bipolar mating type  
214 positively correlate to mating-type loci sizes ( $r = 0.98$ ,  $p$ -value = 0.02, using strain Uh805 for  
215 *U. hordei*), which ranges from 190 kb for *U. brachipodii-distachyi* to 560 kb for *U. hordei*  
216 (Figure 3, Table S1). In conclusion, the proliferation and/or retention of TEs seems to be an  
217 important determinant of the eventual size of mating-type loci.

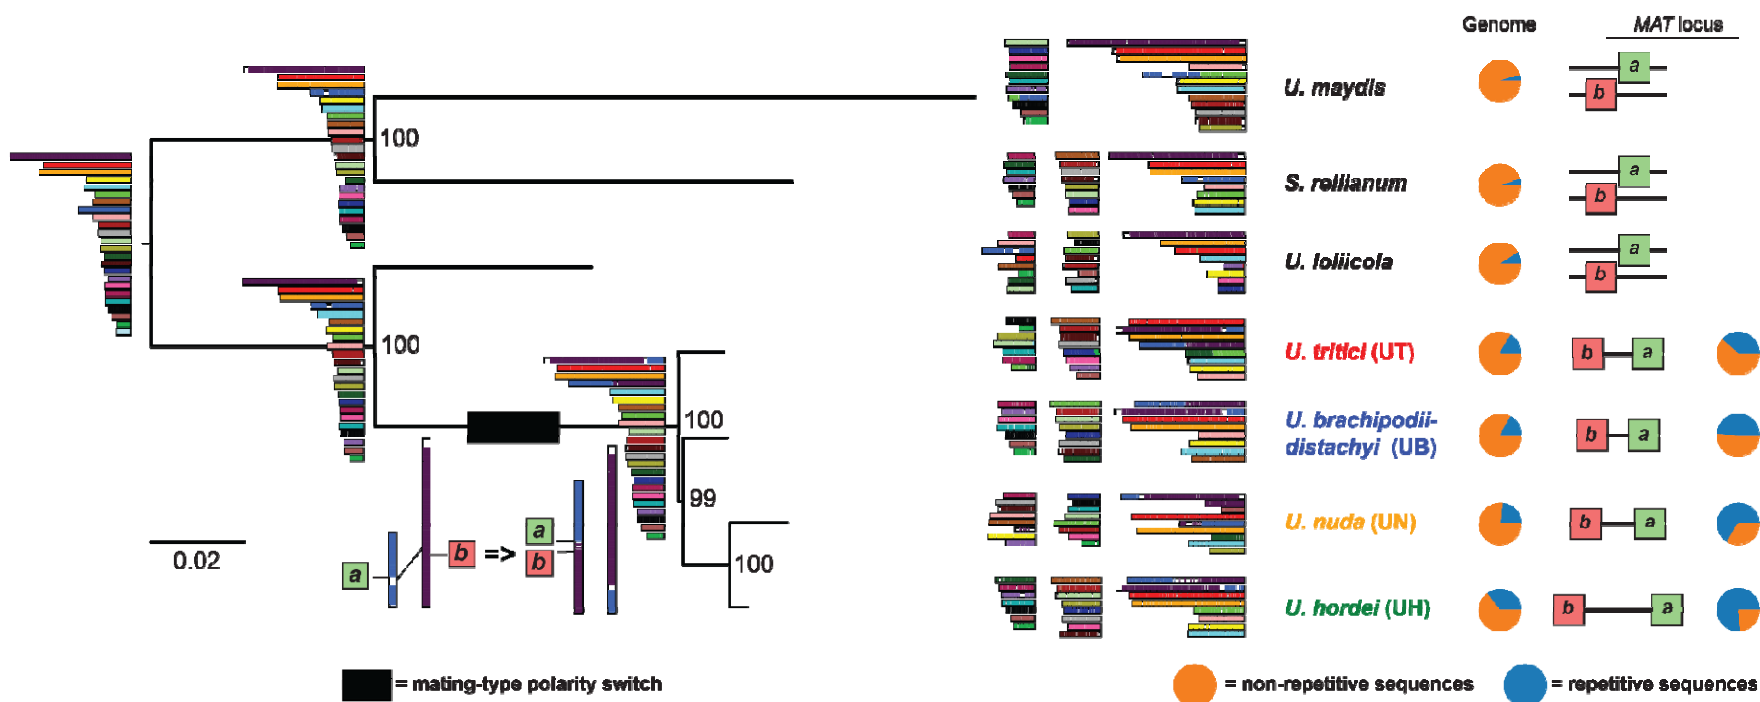

218

219 **Figure 3: Genome evolution of smut species with bi- and tetrapolar mating systems.** (A) Phylogenetic relationship between smut pathogens based on Benchmarking

220 Universal Single-Copy Orthologs (BUSCOs). Phylogenetic relationship between newly and previously sequences smut species was constructed with the *Ustilago*

221 *maydis*/*Sporisorium reilianum* branch as an outgroup. In total, 1,667 BUSCOs were used for tree construction. For *U. hordei*, strain Uh805 was used in the tree. The

222 robustness of the trees was assessed using 100 bootstrap replicates. The colours of the contigs indicate the synteny with the ancestor contigs. The blue section of the circles

223 indicate the repeat fraction that is present in the genome assemblies and within the mating-type loci for species with a bipolar mating-type system.

224 **The timepoint of most recent LTR-RT proliferation differs between smut species**

225 Although species with a bipolar mating system collectively encountered an increase in LTR-  
226 RT content, there are large interspecific differences as *U. hordei* has more than 9 times the  
227 amount of LTR-RT sequences than *U. tritici* (Table 1). To study the relative timepoint of the  
228 most recent LTR-RT proliferation, the nucleotide sequence identity distributions of the best  
229 reciprocal paralogous and orthologous LTR-RT sequences were calculated (Figure 4A). This  
230 was on the one hand done for the species with the highest LTR-RT contents, *U. hordei* and *U.*  
231 *nuda*, and on the other hand for *U. brachipodii-distachyi* and *U. tritici*. The distribution of the  
232 paralogous LTR-RTs in *U. brachipodii-distachyi* and *U. tritici* displayed two maxima, i.e. at  
233 82-83% and at 88-90% (Figure 4A). The maximum of the orthologous LTR-RTs between *U.*  
234 *brachipodii-distachyi* and *U. tritici* was at 93%. Thus, orthologous LTR-RTs generally have a  
235 higher identity than paralogous ones, which indicates that LTR-RTs mainly proliferated  
236 before the last common ancestor of *U. brachipodii-distachyi* and *U. tritici* (Figure 4A).  
237 Orthologous LTR-RTs between *U. hordei* and *U. nuda* displayed a maximum at 89%,  
238 whereas for paralogous LTR-RTs a maximum at 93% was present for *U. nuda* and two  
239 maxima at 94 and 97% for *U. hordei* (Figure 4A). Thus, in contrast to *U. brachipodii-*  
240 *distachyi* and *U. tritici*, paralogous LTR-RTs generally have a higher identity than  
241 orthologous ones, which means that LTR-RTs continued to proliferated after the last common  
242 ancestor of *U. nuda* and *U. hordei*.

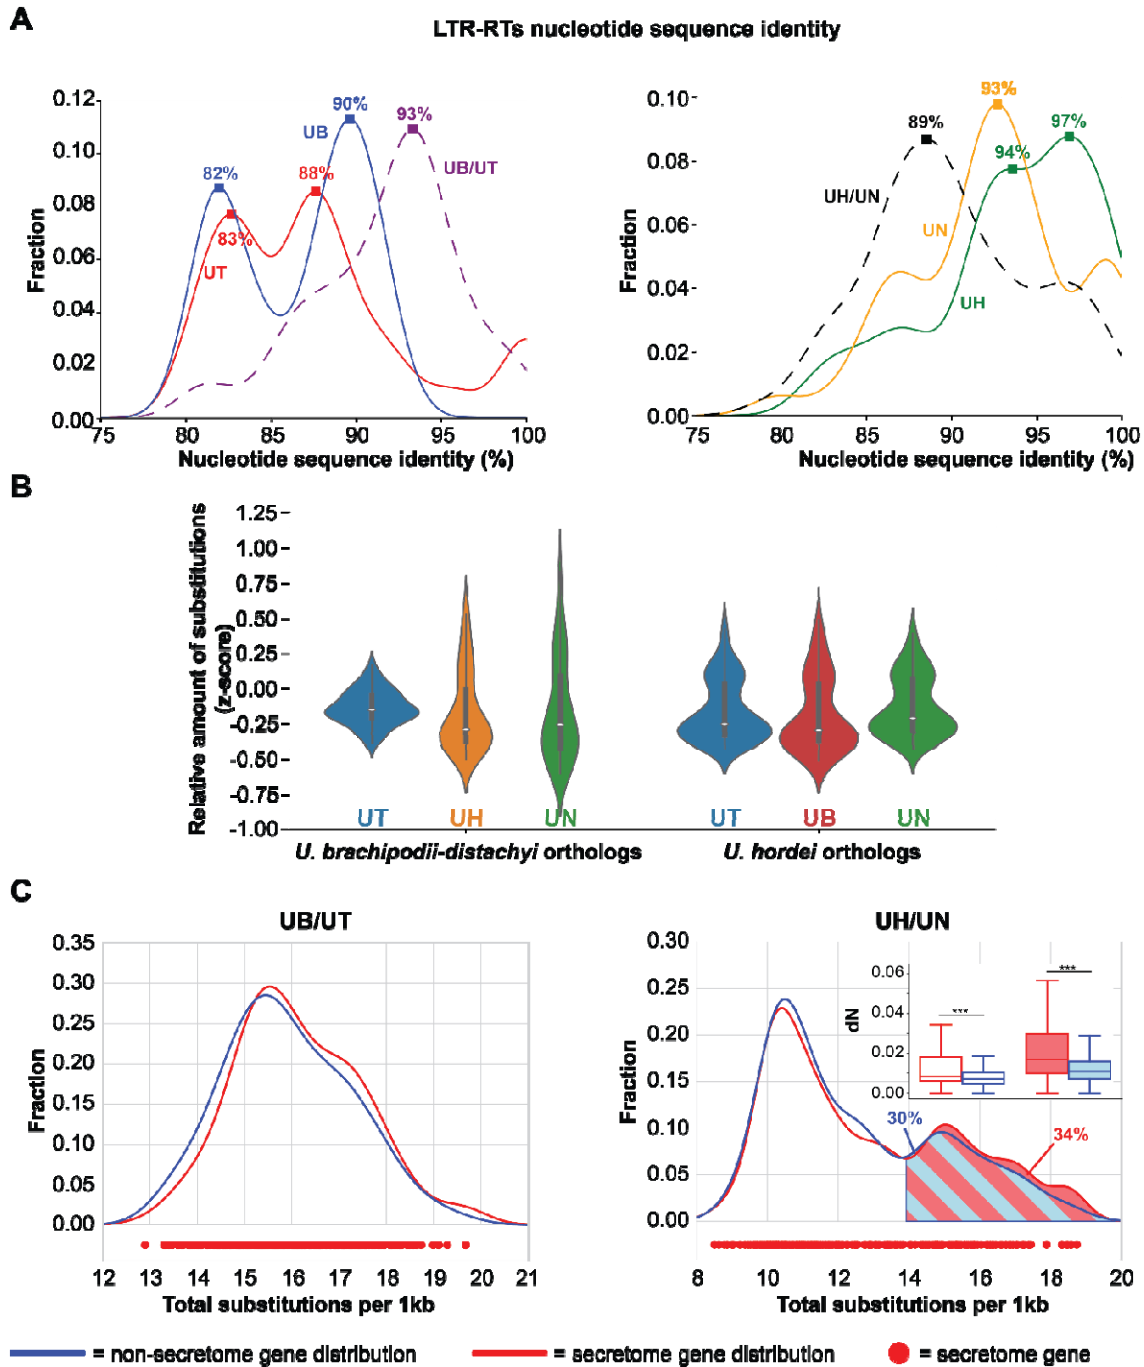

243  
 244 **Figure 4: Interspecific comparison in long terminal repeat retrotransposon (LTR-RT) proliferation and**  
 245 **local gene nucleotide substitution levels (A) Nucleotide sequence identity distribution of best reciprocal**  
 246 **paralogous (full lines) and orthologous (striped lines) LTR-RT sequences. Squares on the lines display maxima**  
 247 **with the corresponding sequence identity value. (B) The normalized sequence identity (z-score) was calculated**  
 248 **for *U. brachipodii-distachyi* and *U. hordei* genes with orthologs of other bipolar mating-type species. The**  
 249 **sequence identity was determined for non-overlapping sliding windows of 75 genes. (C) The distribution of the**

250 sequence divergence between *U. brachipodii-distachyi*/*U. tritici* and *U. hordei*/*U. nuda* ortholog windows (75  
251 genes) are depicted for secretome and non-secretome genes in red and blue, respectively. The *U. hordei*/*U. nuda*  
252 distribution displays two peaks. The number of nonsynonymous substitutions per nonsynonymous site (dN) was  
253 compared between secretome and non-secretome genes for genes in the first and second distribution peak.  
254 Significance was determined with an unequal variance t-test. \*\*\*:  $p$ -value < 0.001.

255

## 256 **High nucleotide substitution levels affect secretome proteins**

257 As TE-active genome regions have been associated with distinct nucleotide substitution  
258 regimes (11, 40, 41), we studied if different extents of LTR-RT fractions are associated with  
259 different nucleotide substitution regimes. We calculated the median number of substitutions  
260 between orthologs in windows of 75 genes. To ensure that genes are transcriptionally active,  
261 we only analysed *U. hordei* genes that displayed expression from here onwards. The variation  
262 in the normalized number of nucleotide substitutions (z-score) between *U. brachipodii-*  
263 *distachyi* and *U. tritici* ortholog windows is around 5.3 and 8.8 times less than *U.*  
264 *brachipodii-distachyi* ortholog windows with *U. hordei* and *U. nuda*, respectively (Figure  
265 4B). In contrast, nucleotide substitutions of *U. hordei* ortholog windows with the other  
266 bipolar mating-type species display a more constant variation as the most varying ortholog  
267 windows (with *U. brachipodii-distachyi*) have only a 0.5 times higher variation than the least  
268 varying (with *U. nuda*) (Figure 4B). Thus, since their last common ancestor, gene nucleotide  
269 sequence divergence occurred more evenly across the genomes of *U. brachipodii-distachyi*  
270 and *U. tritici* than in *U. hordei* and *U. nuda*, where the divergence is more clustered.  
271 Correspondingly, substitutions between *U. brachipodii-distachyi* and *U. tritici* ortholog  
272 windows have a unimodal distribution, whereas the distribution between *U. hordei* and *U.*  
273 *nuda* have two distinct peaks (Figure 4C). For both comparisons, the distributions of  
274 secretome genes generally corresponds to that of non-secretome genes (Figure 4C). For *U.*  
275 *hordei*/*U. nuda* ortholog windows, the second peak in the distribution contains 30% of the



276 non-secretome and 34% of the secretome genes, which is not significantly different (Fisher  
277 exact test,  $p$ -value = 0.10). Thus, high nucleotide substitution levels are not especially  
278 associated with secretome genes. Also for the second distribution peak, no GO terms  
279 enrichments could be found ( $p$ -value < 0.01). Furthermore, nucleotide substitution levels are  
280 negligibly positively correlated (Pearson's  $r$  = 0.14 and  $p$ -value = 0.0026) with the fraction of  
281 species-specific genes (*U. hordei* genes without *U. maydis* ortholog) (Figure S3). In  
282 conclusion, genes in genome regions with high nucleotide substitution levels could not be  
283 associated with a particular function or more clear accessory nature. However, higher  
284 nucleotide substitution levels have a different impact on genes depending on their function.  
285 Substitutions that lead to amino acid alterations are more frequently fixed in secretome genes  
286 than in non-secretome genes (Figure 4C). The median number of nonsynonymous  
287 substitutions per nonsynonymous site (dN) for secretome genes is 18% higher than for non-  
288 secretome genes in the first peak of the *U. hordei* and *U. nuda* secretome distribution,  
289 whereas this is 55% for the second peak. Thus, the more flexible nature of secretome proteins  
290 makes that a higher nucleotide substitution rate speeds up their evolution.

291

### 292 **High substitution levels are association with high fractions of CG substitutions**

293 We then analysed which type of substitutions (AC, AG, AT, CG, CT, GT) occur across the  
294 different substitution levels. The number of all substitution types are positively correlated  
295 with the number of total substitutions. Transitions (AG and CT substitutions) are responsible  
296 for 56% of the different substitution levels between *U. brachipodii-distachyi/U. tritici*  
297 ortholog windows (Figure 5A). In total, 27% of the variance can be attributed to CG  
298 substitutions, whereas the other transversions ranged from 4 to 7%. Similarly, for *U.*  
299 *hordei/U. nuda* ortholog windows, the number of all substitutions types display a positive  
300 correlation with the number of total substitutions. Here, CG substitutions are responsible for

301 47% of the variation in nucleotide substitution levels, whereas the contributions of other  
302 substitution types range from 5% (GT) to 16% (CT) (Figure 5A). The fraction of CG  
303 substitutions varies from 4% to 27% across the ortholog windows, whereas this is 3% to 16%  
304 for *U. brachipodii-distachyi/U. tritici* ortholog windows (Figure S4A). Correspondingly, the  
305 number of all substitution types in intergenetic regions are positively correlated with the total  
306 number of gene substitutions (Figure 5B). Similar to the coding regions, transitions  
307 contributed 52% to the intergenic substitution variation, whereas this was 23% for CG  
308 substitutions and 8-9% for the other transversion in *U. brachipodii-distachyi/U. tritici*  
309 ortholog windows. In contrast, *U. hordei/U. nuda* ortholog windows, transitions only  
310 contributed 40% to the variation of intergenic substitution levels (Figure 5B, S4B). All  
311 substitution types considered, CG displayed the highest variation and was responsible for  
312 24% of the total nucleotide substitution variation. Although CG has, with 24%, the highest  
313 variation, this contrast with the 47% of coding regions. This discrepancy may be due to the  
314 difference in selection regime between coding and non-coding genome regions. The dN for  
315 every individual substitution type is positively correlated with the total substitution level. The  
316 correlation slope is the highest for CG substitutions, which is 3.5 times higher than for the  
317 second highest slope (AT). Similarly, the number of synonymous substitutions per  
318 synonymous site (dS) also has the steepest correlation slope for CG. However, this slope is  
319 only 1.5 times greater than the second highest slope (CT). In conclusion, *U. hordei* and *U.*  
320 *nuda* encountered more variation in their local nucleotide regimes than *U. brachipodii-*  
321 *distachyi* and *U. tritici*. For *U. hordei* and *U. nuda*, genome regions with higher nucleotide  
322 substitution levels encountered a relatively higher fraction of CG substitutions, which, after  
323 selection, is especially apparent in coding regions. Conceivably, different contributions of  
324 substitutions types impact codon frequencies and consequently amino acid compositions of  
325 proteins. Encoded proteins of genes that reside in genome regions with higher substitution

326 levels are Cys, Gln, His, Leu richer and Asp, Gly, Phe, Val poorer than regions with lower  
 327 substitution levels (Figure S5). Moreover, these specific amino acid tendencies have become  
 328 more aggravated since the *U. hordei* divergence from *U. brachipodii-distachyi* (Figure S5).  
 329

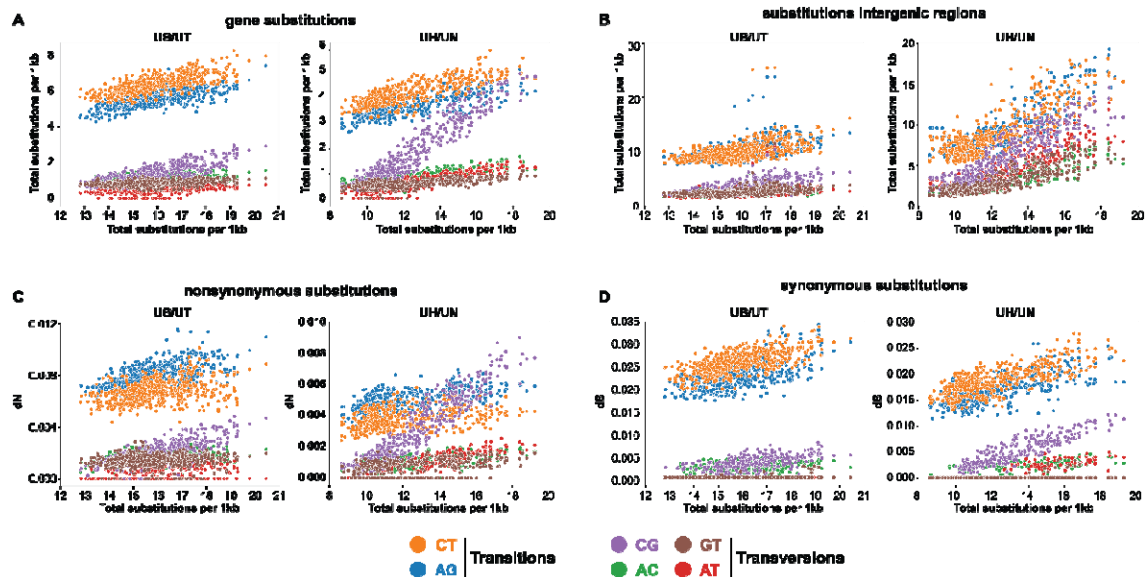

330

331 **Figure 5: Comparison of nucleotide substitution regimes for *U. brachipodii-distachyi*/*U. tritici* and *U.***  
 332 ***hordei*/*U. nuda* ortholog windows.** The nucleotide substitutions were calculated for windows of 75 genes with  
 333 a sliding step of 10. The x-axis consistently displays the total substitutions per 1 kb for these windows. (A) The  
 334 y-axis depicts the median number of every substitution type (CT, AG, CG, AC, GT, AT) of ortholog windows.  
 335 (B) The y-axis depicts the median number of every substitution type for the intergenetic regions of ortholog  
 336 windows. (C) The y-axis depicts the median fraction of nonsynonymous substitutions per nonsynonymous site  
 337 (dN) for every substitution type in ortholog windows. (D) The y-axis depicts the median fraction of synonymous  
 338 substitutions per synonymous site (dS) for every substitution type in ortholog windows.

339 **High local nucleotide substitution levels are associated with LTR-RT proliferation**

340 As higher nucleotide substitution levels with distinct substitution patterns occur in *U. hordei*  
341 and *U. nuda*, which are species with more recent LTR-RT proliferations than *U. brachipodii-*  
342 *distachyi* and *U. tritici*, we looked for a direct association with LTR-RTs. The median  
343 distance of *U. hordei* genes to their closest LTR-RT is significantly, negatively correlated to  
344 the median substitution level (with *U. nuda* orthologs) of ortholog windows (Pearson's  $r = -$   
345  $0.27$ ,  $p$ -value =  $4.74e-9$ ) (Figure 6A). A correlation coefficient of  $-0.27$  points towards a weak  
346 correlation. In conclusion, genes in genome regions with higher nucleotide substitution levels  
347 generally reside closer to LTR-RTs.

348 To study the LTR-RT nucleotide substitution regime, we constructed ancestor LTR-  
349 RT sequences of LTR-RT families, using the convention that TE family members share at  
350 least 80% sequence identity in at least 80% of their sequence with one other family member  
351 (19). To facilitate the sequence alignment and ancestor sequence construction, we only took a  
352 subset of the LTR-RTs and excluded the terminal repetitive sequences (more details in  
353 Material and Methods). In total, ancestors of 13 LTR-RT families were reconstructed using  
354 252 LTR-RT sequences (Figure 6B). We then determined clades in the phylogenetic tree that  
355 solely consists of very similar *U. hordei* LTR-RTs and, thus, recently proliferated in *U.*  
356 *hordei*. In relation to their ancestor sequences, LTR-RTs substitutions consisted 91%  
357 (median) of transitions (Figure S6). In contrast, nucleotide substitutions of their 20kb  
358 flanking regions (excluding repetitive sequences) consisted 62% of transitions (compared to  
359 *U. nuda*). Here, CG comprised the highest fraction of transversions with a median of 14% of  
360 the total substitutions (Figure 6). In contrast, only 1% of the substitutions between LTR-RTs  
361 and their ancestors were CG. In conclusion, LTR-RTs are not subjected to the nucleotide  
362 substitution regime with a high fraction of CG substitutions.

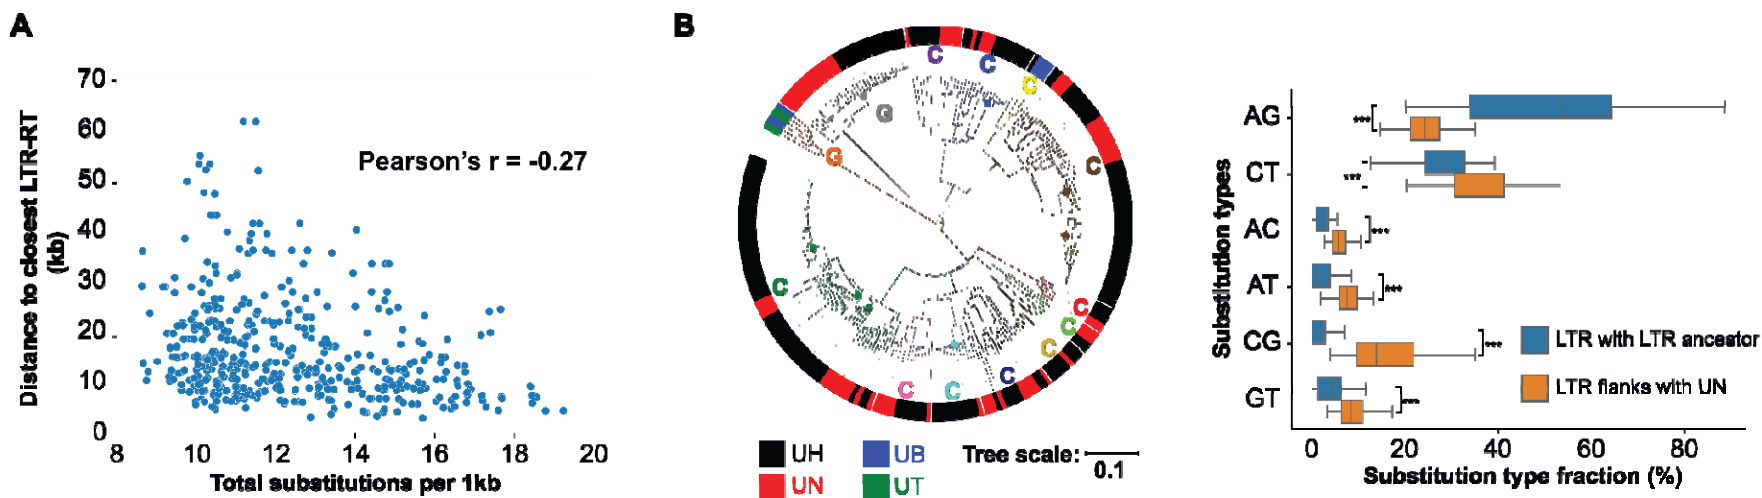

363

364 **Figure 6: High local nucleotide substitution levels are associated with long terminal repeat retrotransposons (LTR-RTs).** (A) The relation between the median number  
 365 of nucleotide substitutions and the median distance between *U. hordei* genes and the closest LTR-RT for ortholog windows of 75 genes with a sliding step of 10. (B) In total,  
 366 252 LTR-RTs are included in the phylogenetic tree and their species of origin is indicated by the outer band colour (UH = *U. hordei*, UN = *U. nuda*, UB = *U. brachipodii*-  
 367 *distachyi*, UT = *U. tritici*). LTR-RTs families are indicated by the circle segments in different colour. Families indicated with “G” are gypsy-type families and “C” are copia-  
 368 type families. For recently proliferated *U. hordei* LTR-RTs, the fractions of the different substitution types were determined with their LTR-RT ancestor that is indicated with  
 369 a circle on the phylogenetic tree. Substitution fractions of the 20 kb flanking regions (40 kb in total) of the LTR-RT with *U. nuda*, excluding repetitive sequences, were also  
 370 determined. Significant differences between LTR and flanking regions were determined for every substitution type individually with an unequal variance t-test. \*\*\*: *p*-value  
 371 < 0.001.

## 372 **Discussion**

373 Nucleotide substitution rates are unevenly distributed across genomes and can be influenced  
374 by numerous factors, including neighbouring nucleotides, recombination frequencies and TE  
375 activity (41–43). Nucleotide divergence in *U. hordei* and *U. nuda* occurred more clustered in  
376 their genomes compared to *U. brachipodii-distachyi* and *U. tritici* (Figure 4B-C). These  
377 differences in regional substitution rates can be directly or indirectly caused by distinct LTR-  
378 RT dynamics, as *U. hordei* and *U. nuda* encountered a more recent LTR-RT proliferation  
379 than *U. brachipodii-distachyi* and *U. tritici* (Figure 4A, Table 1). Moreover, another  
380 association between LTR-RTs and nucleotide substitution rates was found, as gene nucleotide  
381 substitution levels are weakly, negatively correlated to the distance of the closest LTR-RT in  
382 *U. hordei* (Figure 6A). Conceivably, the purge of LTR-RTs from the genome impacts this  
383 correlation considerably, as purged LTR-RTs cannot be detected, but may have had an  
384 impact on the local nucleotide substitution regime. High nucleotide substitution levels are  
385 accompanied with a high fraction of CG substitutions (Figure 5,S4). A relatively high  
386 fraction of CG substitutions is found in the flanking regions of recently proliferated LTR-  
387 RTs, but not for LTR-RTs themselves (Figure 6B). A mechanism to how LTR-RTs may  
388 impact local nucleotide substitution regimes remains elusive. The relation might be  
389 indirectly, and caused by different epigenetic regimes in the genome (44). Distinct  
390 methylation and/or histon modification patterns may occur in LTR-RT-rich genome regions,  
391 which leads to a more erroneous DNA polymerase with high CG substitutions. However,  
392 LTR-RTs themselves are not subjected to a high fraction of CG substitutions. Possibly, DNA  
393 methylation may specifically target LTR-RT sequences, which cause a distinct nucleotide  
394 substitution regime that is different from the LTR-RT flanking regions. Alternatively, the  
395 distinct nucleotide substitution regime may not have an epigenetic origin and originates from  
396 a more erroneous DNA polymerisation of the single stranded LTR-RT flanking regions

397 during LTR-RT insertion. This mechanism has been previously suggested in rice, where  
398 higher nucleotide substitutions levels occur close to TE insertion sites (41). TE insertion  
399 causes cuts in the host DNA, which are then ligated by the host (45, 46). However, the cut  
400 host DNA might become a target for 3'→5' exonuclease resulting in a segment of single-  
401 stranded DNA (41). The complementary strand of this stretch of DNA would then be  
402 synthesized by a replication complex with lower DNA polymerase fidelity and mismatch  
403 repair. This hypothesis could explain why the nucleotide substitution regime with high CG  
404 fractions affect LTR-RT neighbouring regions, but not LTR-RTs themselves.

405 Higher levels of nucleotide substitutions impact the evolution of the genes that reside  
406 in the affected genome regions. Particularly the occurrence of nonsynonymous CG  
407 substitutions strongly increases with higher substitution levels (Figure 5C). These shifts in  
408 nucleotide substitution regime change the amino acid composition of proteins (Figure S5).  
409 High nucleotide substitution levels especially lead to amino acid alteration in secretome  
410 genes, as they are more flexible to amino acid changes than other genes (Figure 4C).  
411 Although the effect of nucleotide substitutions affected secretome genes more, enrichments  
412 of particular gene functions could not be found for genome regions with high nucleotide  
413 substitution levels. Thus, the high substitution levels are not in line with the two-speed  
414 genome model (18, 24), as they do not specifically affect genome regions that are rich in  
415 secretome genes, which include effector gene candidates. More generally, repeat content  
416 were not more frequently found in the proximity of secretome genes compared to other genes  
417 (Figure S2). The specificity and the universality of the two-speed genome model for  
418 filamentous plant pathogens has recently been contested (47, 48). More plant pathogens have  
419 been reported where effector candidates do not especially reside in gene-poor/repeat-rich  
420 regions, such as the leaf spot pathogen *Ramularia collo-cygni* on barley, the earlier

421 mentioned *P. striiformis* f. sp. *tritici* and the barley powdery mildew pathogen *Blumeria*  
422 *graminis* f. sp. *hordei* (49–51).

423 LTR-RTs are mainly responsible for the *U. hordei* genome expansion (Table 1). The  
424 expansion occurred especially in the mating-type locus that increased almost three times in  
425 size in comparison to *U. brachipodii-distachyi* (Table S1). The lack of the purifying  
426 recombination ability in this genome region can be the reason why LTR-RTs especially  
427 accumulated in the mating-type and flanking genome regions (28, 32). Conceivably, this  
428 process is reinforced by the increasing presence of repetitive sequences as the transposition  
429 into a repeat-rich genome region is less likely to have a severe fitness cost than a  
430 transposition into repeat-poor regions. Furthermore, the co-occurrence of high LTR-RTs  
431 genome contents and the switch in mating-type organization from tetra- to bipolar may  
432 indicate that mating-type polarity impacts LTR-RT proliferation and/or retention (52). In case  
433 of biallelic *a* and *b* loci, the switch from a tetra- to bipolarity results in a basidiospore  
434 compatibility change from 25 to 50%. Consequently, it takes a tetrapolar smut on average  
435 longer to find a mating type than a bipolar smut. This longer time might increase the  
436 opportunity to mate with spores from a different offspring and, thus, increase outcrossing.  
437 The higher outcrossing rate for tetra- compared to bipolar smuts is even more pronounced  
438 when multiallelism exists for the *a* and *b* loci (53). Multiallelism increases the compatibility  
439 on population level, whereas compatibility within the same offspring remains 25 and 50% for  
440 tetra- and bipolar smuts, respectively. Lower levels of outcrossing reduce the purifying  
441 recombination ability of smuts, which may be the reason why LTRs could be retained for  
442 longer and proliferate to a further extent in bipolar smuts (28, 52).

443 TEs are import drivers of genome evolution as they directly cause mutagenesis  
444 through their transpositions and indirectly increase the change of non-homologous  
445 recombination due to their repetitive nature (12). LTR-RT proliferation in *U. hordei* indicates



446 that TE activity may also influence local nucleotide substitution regimes and increase the  
447 substitution levels in the genome regions where they insert. Consequently, genes in the  
448 proximity of these insertion sites encounter more nonsynonymous substitutions and thus  
449 evolve faster (Figure 5C). Fast gene evolution may be advantageous under stressful  
450 condition, when TEs are typically more active or change their activity (54, 55).

## 451 **Material and Methods**

### 452 **Genome sequencing and assembly**

453 Genomic DNA from all smut species was isolated using a MasterPure™ Complete  
454 DNA&RNA Purification Kit (Epicentre®, Illumina®, Madison, Wisconsin, USA) according  
455 to the manufacturer's instructions. Long *U. hordei* reads were obtained with the Oxford  
456 Nanopore MinION device. The genomes of six *U. hordei* strains were sequenced: Uh359,  
457 Uh805, Uh811, Uh818, Uh121 and Uh122 (10). The library was prepared according the  
458 Oxford Nanopore Technology (ONT) protocol for native barcoding genomic DNA (EXP-  
459 NBD104 and SQK-LSK109). Three *U. hordei* strains were multiplexed for every run. The  
460 prepared library was loaded on an R9.4.1 Flow Cell. ONT reads were base-called, filtered  
461 (default value) and barcodes were trimmed with the Guppy Basecalling Software v3.5.1 of  
462 ONT. Paired-end *U. hordei* 150 bp reads were obtained with the Illumina HiSeq 4000 device.  
463 Library preparation (500bp insert size) and sequencing were performed by the BGI Group  
464 (Beijing, China). Paired-end *U. hordei* reads were filtered using Trimmomatic v0.39 with the  
465 settings “LEADING:3 TRAILING:3 SLIDINGWINDOW:4:15 MINLEN:100”, only reads  
466 that remained paired after filtering were used in the assembly (56). In total, 3.2-4.5 Gb of  
467 filtered paired-end reads and 1.5-6.5 Gb of filtered Nanopore reads were used for assembly.  
468 An initial assembly was obtained by using the “ONT assembly and Illumina polishing  
469 pipeline” (<https://github.com/nanoporetech/ont-assembly-polish>). The assembly was further  
470 upgraded using the FinisherSC script (57) Mitochondrial contigs were removed from the  
471 assembly and were not used for any analysis. Additionally, small contigs were removed that  
472 contained a paired-end read coverage lower than 50% of the genome-wide average.

473 Long *U. nuda*, *U. loliicola* and *U. tritici* reads were obtained through Single  
474 Molecular Real-Time (SMRT) Sequencing using the PacBio Sequel system. A total of 6.3-  
475 9.7 Gb of raw long reads were obtained for the different species. The initial assembly was

476 obtained using the Canu assembler and was further upgraded with the FinisherSC script (57,  
477 58). Mitochondrial contigs were removed from the assembly and were not used for further  
478 analysis.

479 The quality of genome assemblies was assessed by screening the presences of  
480 BUSCOs using the BUSCO software version 5.0.0 with the database “basidiomycota\_odb10”  
481 (59).

482

### 483 **Transposable element annotation and classification**

484 The smut genome assemblies were scavenged for repetitive sequences in order to construct a  
485 repeat library for repeat annotation. Helitron TEs were identified using the EAHelitron script  
486 (60). LTR-RTs were identified using LTRharvest (61). Miniature inverted-repeat TEs were  
487 identified with MITE Tracker (62). Short interspersed nuclear elements were identified with  
488 the SINE-scan tool (63). Finally, RepeatModeler (v1.0.11) was also used for *de novo* repeat  
489 identification. These repeats were then combined with the repeat library from RepBase  
490 (release20170127) (64). The CD-HIT-EST tool under default settings was used to remove  
491 redundancy in the constructed library (65). RepeatMasker (v4.0.9) was then used to annotate  
492 the repeats to specific genome locations. The annotated repeat sequences were filtered on size  
493 and only sequences larger than 500bp were retained. Furthermore, repeats that were nested or  
494 had more than 50% overlap with other repeats were removed from the library. In case two  
495 repeats had reciprocally 50% overlap was the longest repeat retained. Repeats were classified  
496 into different TE orders using the PASTEC tool using PiRATE-Galaxy (66, 67).

497

### 498 ***U. hordei* RNA sequencing and expression analysis**

499 Total RNA from *U. hordei* strain 4857-4 strain grown axenically and *in planta* was extracted  
500 for three biological replicates. For the axenic samples, *U. hordei* was grown in YEPS light

501 (0.4% yeast extract, 0.4% peptone, and 2% saccharose) liquid medium at 22°C with 200 rpm  
502 shaking till OD:1.0. For the *in planta* samples, Golden Promise barley cultivar was grown in  
503 a greenhouse at 70% relative humidity, at 22°C during the day and the night; with a light/dark  
504 regime of 15/9 hrs and 100 Watt/m<sup>2</sup> supplemental light when the sunlight influx intensity was  
505 less than 150 Watt/m<sup>2</sup>. Barley plants were infected with *U. hordei* through needle injection as  
506 previously described (68) and samples were harvested 3dpi. Here, the third leaves of the *U.*  
507 *hordei* infected barley plants were collected by cutting 1 cm below the injection needle sites.  
508 Leaf samples were then frozen in liquid nitrogen and grinded using a mortar and pestle under  
509 constant liquid nitrogen. The total RNA was isolated by using the TRIzol® extraction method  
510 (Invitrogen; Karlsruhe, Germany) according to the manufacturer's instructions. Subsequently,  
511 total RNA samples were treated with Turbo DNA-Free™ Kit (Ambion/Applied Biosystems;  
512 Darmstadt, Germany) to remove any DNA contamination according to the manufacturer's  
513 instructions. Total RNA was then sent to for library preparation and sequencing to Novogene  
514 (Beijing, China). Libraries (250-300 bp insert size) were loaded on Illumina NovaSeq6000  
515 System for 150bp paired-end sequencing using a S4 flowcell.

516 In total, 5.1-8.4 and 36.0-45.2 Gb of raw reads were obtained for the samples grown  
517 in liquid medium and *in planta*, respectively. The reads were filtered using the Trinity  
518 software (v2.9.1) option trimmomatic under the standard settings (69). The reads were then  
519 mapped to the reference genome using Bowtie 2 (v2.3.5.1) with the first 15 nucleotides on  
520 the 5'-end of the reads being trimmed due to inferior quality (70). The reads were mapped  
521 onto a combined file of the *U. hordei* strain Uh114 genome assembly and the *Hordeum*  
522 *vulgare* (IBSC\_v2) (71) genome assembly. Reads were counted to the *U. hordei* loci using  
523 the R package Rsubread (v1.34.7) (72). Here the default minimum mapping quality score of 0  
524 was used, to include reads that would have multiple best mapping locations. For the gene  
525 loci, reads were counted that were mapped to the predicted coding regions. For the LTR-RT

526 loci, reads were only counted that mapped within LTR-RT loci, excluding the reads that  
527 mapped onto the 10% of either edge of the locus. Loci were considered expressed if they had  
528 more than one count per million in at least two of the six samples (three replicates of two  
529 treatments). Significant differential expression of a locus was calculated using the R package  
530 edgeR (v3.26.8), using the function “decideTestsDGE” (73). Here, a threshold of log<sub>2</sub> fold  
531 change of 1 was used and differential expression was determined using a p-value < 0.01 with  
532 Benjamini-Hochberg correction

533

### 534 **Gene annotation**

535 *U. hordei* genomes were annotated using the BRAKER v2.1.4 pipeline with RNA-Seq and  
536 protein supported training with the options “--softmasking” and “--fungus” enabled (74).  
537 RNA-seq reads from *U. hordei* grown in axenic culture and *in planta* (all replicates) were  
538 mapped to the assemblies using TopHat v2.1.1 (75). Protein predictions from numerous  
539 Ustilaginales species were used to guide the annotation, i.e. *Anthracocystis flocculosa*,  
540 *Melanopsichium pennsylvanicum*, *Moesziomyces antarcticus*, *S. reilianum*, *U. brachipodii-*  
541 *distachyi*, *U. hordei*, *U. maydis* (25–28, 76–78). *U. nuda* and *U. tritici* genomes were also  
542 annotated with the BRAKER v2.1.4 pipeline, but no RNA-seq data was used to guide the  
543 annotation. The option “--fungus” was enabled and the previously published protein files of  
544 the following species were used for protein supported training: *M. pennsylvanicum*, *S.*  
545 *reilianum*, *U. brachipodii-distachyi* and *U. maydis* (25–27, 76). Our annotation of *U. hordei*  
546 Uh805 was also included to train the annotation software. The *U. brachipodii-distachyi* and  
547 *U. maydis* genomes were previously annotated and this annotation was used for analysis (25,  
548 27). Predicted genes that included an internal stop codon or did not start with a methionine  
549 were removed.

550 Secreted proteins are proteins with a predicted signal peptide using SignalP version  
551 5.0 (79) and the absence of a transmembrane domain predicted with TMHMM2.0c in the  
552 protein sequence excluding the signal peptide (80). Gene Ontology (GO) terms were  
553 annotated to the *U. hordei* strain Uh114 protein prediction using InterProScan (v5.42-78.0)  
554 (81). Significance of GO term enrichments in a subset of genes were calculated with a Fisher  
555 exact test with the alternative hypothesis being one-sided (greater). The significance values of  
556 the multiple enrichments were corrected according Benjamini and Hochberg (82).  
557 Carbohydrate-Active enzymes (CAZymes) were annotated using the dbCAN2 meta server  
558 (83, 84). A protein was considered a CAZyme if at least two of the three tools  
559 (HMMER, DIAMOND and Hotpep) predicted a CAZyme function.

560

#### 561 **Comparative genomic analyses.**

562 Phylogenetic trees were constructed based on BUSCOs from the database  
563 “basidiomycota\_odb10” that are present without paralog in all members of the tree (59). For  
564 every gene, the encoded protein sequences were aligned using MAFFT (v7.464) option “--  
565 auto” (85). These aligned protein sequences were then concatenated for every species and  
566 used for tree construction using RAxML (v8.2.11) with substitution model  
567 “PROTGAMMAWAG” and 100 bootstraps (86). Here, protein sequences that were present  
568 in at least 60% of the tree members were excluded for tree construction.

569 Synteny block between the smut genome assemblies of were identified with SynChro  
570 with DeltaRBH = 3 (87, 88). The genome assembly of the epiphytic yeast *Moesziomyces*  
571 *bullatus* ex *Albugo* was included in this analysis to use as an outgroup (89). The ancestral  
572 chromosome gene order was constructed with AnChro with Delta' = 3 and Delta'' = 3 (88,  
573 90). Inter-chromosomal rearrangements, i.e. translocations of two blocks, were identified  
574 with ReChro Delta = 10 (88, 90). No inter-chromosomal rearrangements in *U. nuda* could be

575 automatically detected by ReChro. Here, the inter-chromosomal rearrangement that lead to a  
576 mating-type polarity switch was manually determined.

577 To determine the specificity of *MAT* locus sequences, absent/present polymorphisms  
578 between *U. hordei* strains were determined with NUCmer (version 3.1) from the MUMmer  
579 package with the option “--maxmatch” (91). From the same package, delta-filter with the  
580 option “-1” was used to find the one-to-one alignments.

581

### 582 **LTR-RT evolution**

583 To know the sequence identity distribution, the best orthologous and paralogous LTR-RTs  
584 were identified using blastn (v2.2.31+) (92). LTR-RTs that did not belong to an LTR-RT  
585 family of multiple members, were excluded from the analysis. Members of the same LTR-RT  
586 family share at least 80% sequence identity in at least 80% of their sequence with at least one  
587 other member (19). Orthologous or paralogous LTR-RTs that have reciprocally the highest  
588 bit-score were used for analysis. The nucleotide identity distribution of these orthologous and  
589 paralogous LTR-RTs was constructed using Gaussian Kernel Density Estimation with a  
590 kernel bandwidth of 1.5.

591 To reconstruct the ancestor LTR-RTs, a subset LTR-RTs were used. LTR-RTs were  
592 included that were larger than 3 kb and smaller than 15 kb. Furthermore, repetitive sequences  
593 within the LTR-RT (>50 bp) were indicated using blastn (v2.2.31+) and removed from the  
594 sequence (92). The region between the repeats were then used for ancestor construction if this  
595 region was larger than 500 bp. Here, bedtools (v.2.29.2) function “getfasta” was used (93).  
596 Open reading frames (ORFs) and there encoding amino acid sequence of were determined  
597 with esl-translate (-l 50) as part of the Easel (v0.46) package. Functional domain within these  
598 amino acid sequences were determined with pfam\_scan.pl (-e\_seq 0.01) using the Pfam  
599 database version 32.0 (94). Only sequences were included in the ancestor construction if they

600 had at least 3 different Pfam domains from the following domains: PF00078, PF00665,  
601 PF03732, PF07727, PF08284, PF13975, PF13976, PF14223, PF17917, PF17919 and  
602 PF17921. All of these predicted Pfam domain had to located on the same nucleotide strand in  
603 order to be used for ancestor construction. These sequences were then grouped in families,  
604 according to the definition that family members share at least 80% sequence identity in at  
605 least 80% of their sequence with at least one other member (19). Families were classified in  
606 *Copia* or *Gypsy* using the tool LTRclassifier (95). Ancestors were constructed using prank  
607 (v.170427) with the options “-showall” and “-F”. Nucleotide substitutions between LTR-RTs  
608 and their constructed ancestor were then determined after they were aligned using MAFFT  
609 (v7.464) options “--auto” (85).

610

### 611 **Gene divergence**

612 One-to-one orthologs and homologs between *U. hordei* strains were found using the SiLiX  
613 (v.1.2.10-p1) software with the setting of at least 35% identity and 40% overlap (96).  
614 Homolog groups consisting of two members, each one of a different strain/species, were  
615 considered one-to-one homologs. Nucleotide substitutions for orthologs were identified after  
616 orthologs were aligned using MAFFT (v7.464) options “--auto” (85). Synonymous and  
617 nonsynonymous substitutions between orthologs were identified using SNAP (97). The  
618 nucleotide substitution level distributions were constructed using Gaussian Kernel Density  
619 Estimation with a kernel bandwidth of 0.5.

620

### 621 **Data accession**

622 Raw RNAseq reads and genome assemblies are deposited at NCBI under the BioProject  
623 PRJNA698760.

624



625 **Acknowledgements**

626 This work has been supported by the Alexander von Humboldt Foundation, the European  
627 Research Council (ERC 2017 COG 771035, conVIRgens), the Cluster of Excellence on  
628 Plant Sciences (CEPLAS; Germany's Excellence Strategy–EXC 2048/1 – Project ID:  
629 390686111) and the University of Cologne. We also thank the Regional Computing Centre of  
630 Cologne (RRZK) for access to the Cologne High Efficient Operating Platform for Science  
631 (CHEOPS). We thank Guus Bakkeren for sharing the *U. hordei* strains with us and critically  
632 reading the manuscript. We thank Karl-Josef Müller for the isolation and sharing of the *U.*  
633 *nuda* and *U. tritici* strain with us.

634

635 **SUPPLEMENTAL MATERIAL**

636 **Table S1. Characteristics of the mating-type loci of smut species with a bipolar mating-**  
637 **type system.**

638

639 **Table S2. Transposable elements annotation in various smut genome assemblies.**

640

641 **Figure S1. Phylogenetic relationship between *Ustilago hordei* lineages based on**  
642 **Benchmarking Universal Single-Copy Orthologs (BUSCOs).** In total, 1,692 BUSCOs  
643 were used for tree construction. Homologous BUSCO protein sequences were aligned using  
644 MAFFT and then concatenated for tree construction using RAxML with substitution model  
645 “PROTGAMMAWAG”. *U. nuda* was used as an outgroup species to root the tree. The  
646 robustness of the trees was assessed using 100 bootstrap replicates.

647

648 **Figure S2. Comparison of repeat content of gene flanking regions between expressed**  
649 **secretome genes and other expressed genes.** Upregulated means a significantly higher  
650 expression *in planta* compared to growth in axenic culture. In total, 20 kb sequences on each  
651 side of the genes (40 kb in total) were considered as flanking regions. Significant differences  
652 were calculated with a two-sided T-test. No significant differences with  $p$ -value  $< 0.01$  were  
653 found.

654

655 **Figure S3. Correlation between median nucleotide substitution level and fraction *U.***  
656 ***hordei* (UH) specific genes for ortholog windows.** Ortholog windows of 75 UH genes with  
657 a sliding step of 10 were used to determine the number of substitutions with *U. nuda*. UH  
658 specific genes do not have an ortholog in *U. maydis*.

659

660 **Figure S4. Comparison of nucleotide substitution type fractions for *U. brachipodii-***  
661 ***distachyi/U. tritici* and *U. hordei/U. nuda* ortholog windows.** The nucleotide substitutions  
662 were calculated for windows of 75 genes with a sliding step of 10. The x-axis consistently  
663 displays the total substitutions per 1 kb for these windows. (A) The y-axis depicts the fraction  
664 of every substitution type (CT, AG, CG, AC, GT, AT) of ortholog windows. (B) The y-axis  
665 depicts the fraction of every substitution type for the intergenetic regions of ortholog windows.  
666

667 **Figure S5. Correlations between the nucleotide substitution levels and the encoded**  
668 **amino acid composition of genes.** Correlations were calculated for windows of 75 *U. hordei*  
669 genes with a sliding step of 10. Significant correlations, with  $p$ -value  $< 0.01$ , are indicated by  
670 a black edge around the square. (A) Correlations between amino acid compositions of  
671 encoded *U. hordei* proteins and the number of nucleotide substitutions with *U. nuda*. (B)  
672 Correlations between amino acid alternations for encoded *U. hordei* proteins and the number  
673 of nucleotide substitutions using *U. nuda* and *U. brachipodii-distachyi* orthologs as  
674 comparison.

675  
676 **Figure S6. Fractions of transitions and transversion of recently proliferated *U. hordei***  
677 **long terminal repeat retrotransposons (LTR-RTs) and their flanking regions.** The  
678 fraction of transitions and transversions between recently proliferated *U. hordei* LTR-RTs  
679 and their ancestors were determined. Fractions of the 20 kb flanking regions (40 kb in total)  
680 of the LTR-RT with *U. nuda* (UN) were also determined. Significant differences between  
681 LTR and flanking regions were determined for transitions and transversions separately with  
682 an unequal variance t-test. \*\*\*:  $p$ -value  $< 0.001$ .

## 683 References

- 684 1. Bourque G, Burns KH, Gehring M, Gorbunova V, Seluanov A, Hammell M, Imbeault  
685 M, Izsvák Z, Levin HL, Macfarlan TS, Mager DL, Feschotte C. 2018. Ten things you  
686 should know about transposable elements. *Genome Biol* 19:199.
- 687 2. Stajich JE. 2017. Fungal genomes and insights into the evolution of the kingdom, p.  
688 619–633. *In* *The Fungal Kingdom*.
- 689 3. Stukenbrock EH, Croll D. 2014. The evolving fungal genome. *Fungal Biol Rev* 28:1-  
690 12.
- 691 4. Katinka MD, Duprat S, Cornillott E, Méténler G, Thomarat F, Prensier G, Barbe V,  
692 Peyretailade E, Brottier P, Wincker P, Delbac F, El Alaoul H, Peyret P, Saurin W,  
693 Gouy M, Weissenbach J. 2001. Genome sequence and gene compaction of the  
694 eukaryote parasite *Encephalitozoon cuniculi*. *Nature* 414:450-453.
- 695 5. Corradi N, Pombert JF, Farinelli L, Didier ES, Keeling PJ. 2010. The complete  
696 sequence of the smallest known nuclear genome from the microsporidian  
697 *Encephalitozoon intestinalis*. *Nat Commun* 1:77.
- 698 6. Ramos AP, Tavares S, Tavares D, Silva MDC, Loureiro J, Talhinhos P. 2015. Flow  
699 cytometry reveals that the rust fungus, *Uromyces bidentis* (Pucciniales), possesses the  
700 largest fungal genome reported-2489Mbp. *Mol Plant Pathol* 16:1006-1010.
- 701 7. Tavares S, Ramos AP, Pires AS, Azinheira HG, Caldeirinha P, Link T, Abranches R,  
702 Silva M do C, Voegelé RT, Loureiro J, Talhinhos P. 2014. Genome size analyses of  
703 Pucciniales reveal the largest fungal genomes. *Front Plant Sci* 5:422.
- 704 8. Cuomo CA, Bakkeren G, Khalil HB, Panwar V, Joly D, Linning R, Sakthikumar S,  
705 Song X, Adiconis X, Fan L, Goldberg JM, Levin JZ, Young S, Zeng Q, Anikster Y,  
706 Bruce M, Wang M, Yin C, McCallum B, Szabo LJ, Hulbert S, Chen X, Fellers JP.  
707 2017. Comparative analysis highlights variable genome content of wheat rusts and  
708 divergence of the mating loci. *G3* 7:361–376.
- 709 9. Oggenfuss U, Badet T, Wicker T, Hartmann FE, Singh NK, Abraham L, Karisto P,  
710 Vonlanthen T, Mundt C, McDonald BA, Croll D. 2021. A population-level invasion  
711 by transposable elements triggers genome expansion in a fungal pathogen. *Elife*  
712 10:e69249.
- 713 10. Ali S, Laurie JD, Linning R, Cervantes-Chávez JA, Gaudet D, Bakkeren G. 2014. An  
714 immunity-triggering effector from the barley smut fungus *Ustilago hordei* resides in an  
715 Ustilaginaceae-specific cluster bearing signs of transposable element-assisted  
716 evolution. *PLoS Pathog* 10:e1004223.
- 717 11. Faino L, Seidl MF, Shi-Kunne X, Pauper M, van den Berg GCM, Wittenberg AHJ,  
718 Thomma BPHJ. 2016. Transposons passively and actively contribute to evolution of  
719 the two-speed genome of a fungal pathogen. *Genome Res* 26:1091–1100.
- 720 12. Seidl MF, Thomma BPHJ. 2014. Sex or no sex: Evolutionary adaptation occurs  
721 regardless. *BioEssays* 36:335–345.
- 722 13. Thines M. 2019. An evolutionary framework for host shifts – jumping ships for  
723 survival. *New Phytol* 224:605-617.
- 724 14. Cook DE, Mesarich CH, Thomma BPHJ. 2015. Understanding plant immunity as a  
725 surveillance system to detect invasion. *Annu Rev Phytopathol* 53:541–563.

- 726 15. Rouxel T, Balesdent MH. 2017. Life, death and rebirth of avirulence effectors in a  
727 fungal pathogen of Brassica crops, *Leptosphaeria maculans*. *New Phytol* 214:526-532.
- 728 16. Depotter JRL, Doehlemann G. 2020. Target the core: durable plant resistance against  
729 filamentous plant pathogens through effector recognition. *Pest Manag Sci* 76:426-431.
- 730 17. Dong S, Raffaele S, Kamoun S. 2015. The two-speed genomes of filamentous  
731 pathogens: waltz with plants. *Curr Opin Genet Dev* 35:57-65.
- 732 18. Croll D, McDonald BA. 2012. The accessory genome as a cradle for adaptive  
733 evolution in pathogens. *PLoS Pathog* 8:e1002608.
- 734 19. Wicker T, Sabot F, Hua-Van A, Bennetzen JL, Capy P, Chalhoub B, Flavell A, Leroy  
735 P, Morgante M, Panaud O, Paux E, SanMiguel P, Schulman AH. 2007. A unified  
736 classification system for eukaryotic transposable elements. *Nat Rev Genet* 8:973-982.
- 737 20. Finnegan DJ. 2012. Retrotransposons. *Curr Biol* 22:R432-R437.
- 738 21. Havecker ER, Gao X, Voytas DF. 2004. The diversity of LTR retrotransposons.  
739 *Genome Biol* 5:225.
- 740 22. Zuo W, Ökmen B, Depotter JRL, Ebert MK, Redkar A, Misas Villamil J, Doehlemann  
741 G. 2019. Molecular interactions between smut fungi and their host plants. *Annu Rev*  
742 *Phytopathol* 57:411-430.
- 743 23. Möller M, Stukenbrock EH. 2017. Evolution and genome architecture in fungal plant  
744 pathogens. *Nat Rev Microbiol* 15:756-771.
- 745 24. Raffaele S, Kamoun S. 2012. Genome evolution in filamentous plant pathogens: why  
746 bigger can be better. *Nat Rev Microbiol* 10:417-430.
- 747 25. Kämper J, Kahmann R, Bölker M, Ma LJ, Brefort T, Saville BJ, Banuett F, Kronstad  
748 JW, Gold SE, Müller O, Perlin MH, Wösten HAB, De Vries R, Ruiz-Herrera J,  
749 Reynaga-Peña CG, Snetselaar K, McCann M, Pérez-Martín J, Feldbrügge M, Basse  
750 CW, Steinberg G, Ibeas JI, Holloman W, Guzman P, Farman M, Stajich JE,  
751 Sentandreu R, González-Prieto JM, Kennell JC, Molina L, Schirawski J, Mendoza-  
752 Mendoza A, Greilinger D, Münch K, Rössel N, Scherer M, Vraněš M, Ladendorf O,  
753 Vincon V, Fuchs U, Sandrock B, Meng S, Ho ECH, Cahill MJ, Boyce KJ, Klose J,  
754 Klosterman SJ, Deelstra HJ, Ortiz-Castellanos L, Li W, Sanchez-Alonso P, Schreier  
755 PH, Häuser-Hahn I, Vaupel M, Koopmann E, Friedrich G, Voss H, Schlüter T,  
756 Margolis J, Platt D, Swimmer C, Gnirke A, Chen F, Vysotskaia V, Mannhaupt G,  
757 Güldener U, Münsterkötter M, Haase D, Oesterheld M, Mewes HW, Mauceli EW,  
758 DeCaprio D, Wade CM, Butler J, Young S, Jaffe DB, Calvo S, Nusbaum C, Galagan J,  
759 Birren BW. 2006. Insights from the genome of the biotrophic fungal plant pathogen  
760 *Ustilago maydis*. *Nature* 444:97-101.
- 761 26. Schirawski J, Mannhaupt G, Münch K, Brefort T, Schipper K, Doehlemann G, Di  
762 Stasio M, Rössel N, Mendoza-Mendoza A, Pester D, Müller O, Winterberg B, Meyer  
763 E, Ghareeb H, Wollenberg T, Münsterkötter M, Wong P, Walter M, Stukenbrock E,  
764 Güldener U, Kahmann R. 2010. Pathogenicity determinants in smut fungi revealed by  
765 genome comparison. *Science* 330:1546-1548.
- 766 27. Rabe F, Bosch J, Stirnberg A, Guse T, Bauer L, Seitner D, Rabanal FA, Czedik-  
767 eysenberg A, Uhse S, Bindics J, Genencher B, Navarrete F, Kellner R, Ekker H,  
768 Kumlehn J, Vogel JP, Gordon SP, Walter MC, Marcel TC, Mu M, Sieber CMK,  
769 Mannhaupt G, Gu U, Kahmann R, Djamei A. 2016. A complete toolset for the study of

- 770 *Ustilago bromivora* and *Brachypodium* sp. as a fungal-temperate grass pathosystem.  
771 Elife 5:e20522.
- 772 28. Laurie JD, Ali S, Linning R, Mannhaupt G, Wong P, Guldener U, Munsterkötter M,  
773 Moore R, Kahmann R, Bakkeren G, Schirawski J. 2012. Genome comparison of barley  
774 and maize smut fungi reveals targeted loss of RNA silencing components and species-  
775 specific presence of transposable elements. *Plant Cell* 24:1733–1745.
- 776 29. Kruse J, Dietrich W, Zimmermann H, Klenke F, Richter U, Richter H, Thines M.  
777 2018. *Ustilago* species causing leaf-stripe smut revisited. *IMA Fungus* 9:49–73.
- 778 30. Maire RCJ. 1919. Une ustilagineuse nouvelle de la flore nord-Africaine. *Bull la Société*  
779 *d’Histoire Nat l’Afrique du Nord* 10:46–47.
- 780 31. Bakkeren G, Kronstad JW. 1994. Linkage of mating-type loci distinguishes bipolar  
781 from tetrapolar mating in basidiomycetous smut fungi. *Proc Natl Acad Sci U S A*  
782 91:7085-7089.
- 783 32. Lee N, Bakkeren G, Wong K, Sherwood JE, Kronstad JW. 1999. The mating-type and  
784 pathogenicity locus of the fungus *Ustilago hordei* spans a 500-kb region. *Proc Natl*  
785 *Acad Sci U S A* 96:15026-15031.
- 786 33. Gillissen B, Bergemann J, Sandmann C, Schroerer B, Bölker M, Kahmann R. 1992. A  
787 two-component regulatory system for self/non-self recognition in *Ustilago maydis*.  
788 *Cell* 68:647-657.
- 789 34. Raudaskoski M, Kothe E. 2010. Basidiomycete mating type genes and pheromone  
790 signaling. *Eukaryot Cell* 9:847-859.
- 791 35. Bakkeren G, Jiang G, Warren RL, Butterfield Y, Shin H, Chiu R, Linning R, Schein J,  
792 Lee N, Hu G, Kupfer DM, Tang Y, Roe BA, Jones S, Marra M, Kronstad JW. 2006.  
793 Mating factor linkage and genome evolution in basidiomycetous pathogens of cereals.  
794 *Fungal Genet Biol* 43:655-666.
- 795 36. Yadav V, Sun S, Billmyre RB, Thimmappa BC, Shea T, Lintner R, Bakkeren G,  
796 Cuomo CA, Heitman J, Sanyal K. 2018. RNAi is a critical determinant of centromere  
797 evolution in closely related fungi. *Proc Natl Acad Sci U S A* 115:3108-3113.
- 798 37. Schweizer G, Munch K, Mannhaupt G, Schirawski J, Kahmann R, Duteil J. 2018.  
799 Positively selected effector genes and their contribution to virulence in the smut fungus  
800 *Sporisorium reilianum*. *Genome Biol Evol* 10:629–645.
- 801 38. Zuther K, Kahnt J, Utermark J, Imkampe J, Uhse S, Schirawski J. 2012. Host  
802 specificity of *Sporisorium reilianum* is tightly linked to generation of the phytoalexin  
803 luteolinidin by *Sorghum bicolor*. *Mol Plant-Microbe Interact* 25:1230–1237.
- 804 39. Wang Q-M, Begerow D, Groenewald M, Liu X-Z, Theelen B, Bai F-Y, Boekhout T.  
805 2015. Multigene phylogeny and taxonomic revision of yeasts and related fungi in the  
806 *Ustilaginomycotina*. *Stud Mycol* 81:55–83.
- 807 40. Depotter JRL, Shi-Kunne X, Missonnier H, Liu T, Faino L, van den Berg GCM, Wood  
808 TA, Zhang B, Jacques A, Seidl MF, Thomma BPHJ. 2019. Dynamic virulence-related  
809 regions of the plant pathogenic fungus *Verticillium dahliae* display enhanced sequence  
810 conservation. *Mol Ecol* 28:3482-3495.
- 811 41. Wicker T, Yu Y, Haberer G, Mayer KFX, Marri PR, Rounsley S, Chen M, Zuccolo A,  
812 Panaud O, Wing RA, Roffler S. 2016. DNA transposon activity is associated with  
813 increased mutation rates in genes of rice and other grasses. *Nat Commun* 7:12790.



- 814 42. Lercher MJ, Hurst LD. 2002. Human SNP variability and mutation rate are higher in  
815 regions of high recombination. *Trends Genet* 18:337-340.
- 816 43. Hwang DG, Green P. 2004. Bayesian Markov chain Monte Carlo sequence analysis  
817 reveals varying neutral substitution patterns in mammalian evolution. *Proc Natl Acad*  
818 *Sci U S A* 101:13994-14001.
- 819 44. Habig M, Lorrain C, Feurtey A, Komlusi J, Stukenbrock EH. 2021. Epigenetic  
820 modifications affect the rate of spontaneous mutations in a pathogenic fungus. *Nat*  
821 *Commun* 12:5869.
- 822 45. Lee GE, Mauro E, Parissi V, Shin CG, Lesbats P. 2019. Structural insights on  
823 retroviral DNA integration: learning from foamy viruses. *Viruses* 21:249-256.
- 824 46. Lesbats P, Engelman AN, Cherepanov P. 2016. Retroviral DNA integration. *Chem*  
825 *Rev* 116:12730-12757.
- 826 47. Torres DE, Oggenfuss U, Croll D, Seidl MF. 2020. Genome evolution in fungal plant  
827 pathogens: looking beyond the two-speed genome model. *Fungal Biol Rev* 3:136-143.
- 828 48. Frantzeskakis L, Kusch S, Panstruga R. 2019. The need for speed □:  
829 compartmentalized genome evolution in filamentous phytopathogens. *Mol Plant*  
830 *Pathol* 20:3–7.
- 831 49. Stam R, Münsterkötter M, Pophaly SD, Fokkens L, Sghyer H, Güldener U,  
832 Hückelhoven R, Hess M. 2018. A new reference genome shows the one-speed genome  
833 structure of the barley pathogen *Ramularia collo-cygni*. *Genome Biol Evol* 10:3243-  
834 3249.
- 835 50. Frantzeskakis L, Kracher B, Kusch S, Yoshikawa-Maekawa M, Bauer S, Pedersen C,  
836 Spanu PD, Maekawa T, Schulze-Lefert P, Panstruga R. 2018. Signatures of host  
837 specialization and a recent transposable element burst in the dynamic one-speed  
838 genome of the fungal barley powdery mildew pathogen. *BMC Genomics* 19:381.
- 839 51. Schwessinger B, Sperschneider J, Cuddy WS, Garnica DP, Miller ME, Taylor JM,  
840 Dodds PN, Figueroa M, Park RF, Rathjen P. 2018. A near-complete haplotype-phased  
841 genome of the dikaryotic. *MBio* 9:e02275-17.
- 842 52. Laurie JD, Linning R, Wong P, Bakkeren G. 2013. Do TE activity and counteracting  
843 genome defenses, RNAi and methylation, shape the sex lives of smut fungi? *Plant*  
844 *Signal Behav* 8:e23853.
- 845 53. Coelho MA, Bakkeren G, Sun S, Hood ME, Giraud T. 2018. Fungal Sex: The  
846 Basidiomycota, p. 147–175. *In* Heitman, J, Howlett, BJ, Crous, PW, Stukenbrock, EH,  
847 James, TY, Gow, NAR (eds.), *The Fungal Kingdom*. American Society of  
848 Microbiology, Washington DC.
- 849 54. Horváth V, Merenciano M, González J. 2017. Revisiting the relationship between  
850 transposable elements and the eukaryotic stress response. *Trends Genet* 33:832-841.
- 851 55. Fouché S, Badet T, Oggenfuss U, Plissonneau C, Francisco CS, Croll D. 2020. Stress-  
852 driven transposable element de-repression dynamics and virulence evolution in a  
853 fungal pathogen. *Mol Biol Evol* 37:221-239.
- 854 56. Bolger AM, Lohse M, Usadel B. 2014. Trimmomatic: a flexible trimmer for Illumina  
855 sequence data. *Bioinformatics* 30:2114-2120.
- 856 57. Lam KK, Labutti K, Khalak A, Lam K, Tse D. 2015. FinisherSC: a repeat-aware tool  
857 for upgrading de-novo assembly using long reads. *Bioinformatics* 31:3207–3209.

- 858 58. Koren S, Walenz BP, Berlin K, Miller JR, Bergman NH, Phillippy AM. 2017. Canu: a  
859 scalable and accurate long-read assembly via adaptive k-mer weighting and repeat  
860 separation. *Genome Res* 27:722–736.
- 861 59. Seppy M, Manni M, Zdobnov EM. 2019. BUSCO: Assessing genome assembly and  
862 annotation completeness, p. 227-245. *In* *Methods in Molecular Biology*. Humana Press  
863 Inc.
- 864 60. Hu K, Xu K, Wen J, Yi B, Shen J, Ma C, Fu T, Ouyang Y, Tu J. 2019. Helitron  
865 distribution in Brassicaceae and whole genome Helitron density as a character for  
866 distinguishing plant species. *BMC Bioinformatics* 20:354.
- 867 61. Ellinghaus D, Kurtz S, Willhoeft U. 2008. LTRharvest, an efficient and flexible  
868 software for de novo detection of LTR retrotransposons. *BMC Bioinformatics* 9:18.
- 869 62. Crescente JM, Zavallo D, Helguera M, Vanzetti LS. 2018. MITE Tracker: an accurate  
870 approach to identify miniature inverted-repeat transposable elements in large genomes.  
871 *BMC Bioinformatics* 19:348.
- 872 63. Mao H, Wang H. 2017. SINE-scan: An efficient tool to discover short interspersed  
873 nuclear elements (SINEs) in large-scale genomic datasets. *Bioinformatics* 33:743-745.
- 874 64. Bao W, Kojima KK, Kohany O. 2015. Repbase Update, a database of repetitive  
875 elements in eukaryotic genomes. *Mob DNA* 6:11.
- 876 65. Li W, Godzik A. 2006. Cd-hit: a fast program for clustering and comparing large sets  
877 of protein or nucleotide sequences. *Bioinformatics* 22:1658-1659.
- 878 66. Hoede C, Arnoux S, Moisset M, Chaumier T, Inizan O, Jamilloux V, Quesneville H.  
879 2014. PASTEC: An automatic transposable element classification tool. *PLoS One*  
880 9:e91929.
- 881 67. Berthelie J, Casse N, Daccord N, Jamilloux V, Saint-Jean B, Carrier G. 2018. A  
882 transposable element annotation pipeline and expression analysis reveal potentially  
883 active elements in the microalga *Tisochrysis lutea*. *BMC Genomics* 19:378.
- 884 68. Ökmen B, Mathow D, Hof A, Lahrmann U, Aßmann D, Doehlemann G. 2018. Mining  
885 the effector repertoire of the biotrophic fungal pathogen *Ustilago hordei* during host  
886 and non-host infection. *Mol Plant Pathol* 19:2603–2622.
- 887 69. Grabherr MG., Brian J. Haas, Moran Yassour Joshua Z. Levin, Dawn A. Thompson,  
888 Ido Amit, Xian Adiconis, Lin Fan, Raktima Raychowdhury, Qiandong Zeng, Zehua  
889 Chen, Evan Mauceli, Nir Hacohen, Andreas Gnirke, Nicholas Rhind, Federica di  
890 Palma, Bruce W. N, Friedman and AR. 2013. Trinity: reconstructing a full-length  
891 transcriptome without a genome from RNA-Seq data. *Nat Biotechnol* 29:644–652.
- 892 70. Langmead B, Salzberg SL. 2012. Fast gapped-read alignment with Bowtie 2. *Nat*  
893 *Methods* 9:357–359.
- 894 71. Mascher M, Gundlach H, Himmelbach A, Beier S, Twardziok SO, Wicker T, Radchuk  
895 V, Dockter C, Hedley PE, Russell J, Bayer M, Ramsay L, Liu H, Haberer G, Zhang  
896 XQ, Zhang Q, Barrero RA, Li L, Taudien S, Groth M, Felder M, Hastie A, Šimková  
897 H, Stanková H, Vrána J, Chan S, Munõz-Amatriaín M, Ounit R, Wanamaker S, Bolser  
898 D, Colmsee C, Schmutzer T, Aliyeva-Schnorr L, Grasso S, Tanskanen J, Chailyan A,  
899 Sampath D, Heavens D, Clissold L, Cao S, Chapman B, Dai F, Han Y, Li H, Li X, Lin  
900 C, McCooke JK, Tan C, Wang P, Wang S, Yin S, Zhou G, Poland JA, Bellgard MI,  
901 Borisjuk L, Houben A, Doleael J, Ayling S, Lonardi S, Kersey P, Langridge P,



- 902 Muehlbauer GJ, Clark MD, Caccamo M, Schulman AH, Mayer KFX, Platzer M, Close  
903 TJ, Scholz U, Hansson M, Zhang G, Braumann I, Spannagl M, Li C, Waugh R, Stein  
904 N. 2017. A chromosome conformation capture ordered sequence of the barley genome.  
905 Nature 544:427-433.
- 906 72. Liao Y, Smyth GK, Shi W. 2019. The R package Rsubread is easier, faster, cheaper  
907 and better for alignment and quantification of RNA sequencing reads. Nucleic Acids  
908 Res 47:e47.
- 909 73. Robinson MD, McCarthy DJ, Smyth GK. 2010. edgeR: A Bioconductor package for  
910 differential expression analysis of digital gene expression data. Bioinformatics 26:139-  
911 140.
- 912 74. Hoff KJ, Lomsadze A, Borodovsky M, Stanke M. 2019. Whole-genome annotation  
913 with BRAKER, p. 65–95. *In* Methods in Molecular Biology. Humana Press Inc.
- 914 75. Kim D, Pertea G, Trapnell C, Pimentel H, Kelley R, Salzberg SL. 2013. TopHat2□:  
915 accurate alignment of transcriptomes in the presence of insertions , deletions and gene  
916 fusions. Genome Biol 14:R36.
- 917 76. Sharma R, Mishra B, Runge F, Thines M. 2014. Gene loss rather than gene gain is  
918 associated with a host jump from monocots to dicots in the smut fungus  
919 *Melanopsichium pennsylvanicum*. Genome Biol Evol 6:2034–2049.
- 920 77. Lefebvre F, Joly DL, Labbe C, Teichmann B, Linning R, Belzile F, Bakkeren G,  
921 Belanger RR. 2013. The transition from a phytopathogenic smut ancestor to an  
922 anamorphic biocontrol agent deciphered by comparative whole-genome analysis. Plant  
923 Cell 25:1946–1959.
- 924 78. Morita T, Koike H, Koyama Y, Hagiwara H, Ito E, Fukuoka T, Imura T, Machida M,  
925 Kitamoto D. 2013. Genome sequence of the basidiomycetous yeast *Pseudozyma*  
926 *antarctica* T-34 , a producer of the glycolipid biosurfactants. Genome Announc  
927 1:e00064-13.
- 928 79. Juan J, Armenteros A, Tsirigos KD, Sønderby CK, Petersen TN, Winther O, Brunak S,  
929 Heijne G Von, Nielsen H. 2019. SignalP 5.0 improves signal peptide predictions using  
930 deep neural networks. Nat Biotechnol 37:420–423.
- 931 80. Krogh A, Larsson B, Von Heijne G, Sonnhammer ELL. 2001. Predicting  
932 transmembrane protein topology with a hidden Markov model: application to complete  
933 genomes. J Mol Biol 305:567-580.
- 934 81. Jones P, Binns D, Chang HY, Fraser M, Li W, McAnulla C, McWilliam H, Maslen J,  
935 Mitchell A, Nuka G, Pesseat S, Quinn AF, Sangrador-Vegas A, Scheremetjew M,  
936 Yong SY, Lopez R, Hunter S. 2014. InterProScan 5: genome-scale protein function  
937 classification. Bioinformatics 30:1236–1240.
- 938 82. Benjamini Y, Hochberg Y. 1995. Controlling the false discovery rate□: a practical and  
939 powerful approach to multiple testing. J R Stat Soc B 57:289–300.
- 940 83. Yin Y, Mao X, Yang J, Chen X, Mao F, Xu Y. 2012. DbCAN: a web resource for  
941 automated carbohydrate-active enzyme annotation. Nucleic Acids Res 40:W445-451.
- 942 84. Zhang H, Yohe T, Huang L, Entwistle S, Wu P, Yang Z, Busk PK, Xu Y, Yin Y.  
943 2018. DbCAN2: A meta server for automated carbohydrate-active enzyme annotation.  
944 Nucleic Acids Res 46:W95-W101.
- 945 85. Katoh K, Standley DM. 2013. MAFFT multiple sequence alignment software version

- 946 7: Improvements in performance and usability. *Mol Biol Evol* 30:772–780.
- 947 86. Stamatakis A. 2014. RAxML version 8: A tool for phylogenetic analysis and post-  
948 analysis of large phylogenies. *Bioinformatics* 30:1312–1313.
- 949 87. Drillon G, Carbone A, Fischer G. 2014. SynChro: a fast and easy tool to reconstruct  
950 and visualize synteny blocks along eukaryotic chromosomes. *PLoS One* 9:e92621.
- 951 88. Drillon G, Carbone A, Fischer G. 2013. Combinatorics of chromosomal  
952 rearrangements based on synteny blocks and synteny packs. *J Log Comput* 23:815-  
953 838.
- 954 89. Eitzen K, Sengupta P, Kroll S, Kemen E, Doehlemann G. 2021. A fungal member of  
955 the *Arabidopsis thaliana* phyllosphere antagonizes *Albugo laibachii* via a GH25  
956 lysozyme. *Elife* 10:e65306.
- 957 90. Vakirlis N, Sarilar V, Drillon G, Fleiss A, Agier N, Meyniel JP, Blanpain L, Carbone  
958 A, Devillers H, Dubois K, Gillet-Markowska A, Graziani S, Huu-Vang N, Poirel M,  
959 Reisser C, Schott J, Schacherer J, Lafontaine I, Llorente B, Neuvéglise C, Fischer G.  
960 2016. Reconstruction of ancestral chromosome architecture and gene repertoire reveals  
961 principles of genome evolution in a model yeast genus. *Genome Res* 26:918-932.
- 962 91. Kurtz S, Phillippy A, Delcher AL, Smoot M, Shumway M, Antonescu C, Salzberg SL.  
963 2004. Versatile and open software for comparing large genomes. *Genome Biol* 5:R12.
- 964 92. Altschul SF, Gish W, Miller W, Myers EW, Lipman DJ. 1990. Basic local alignment  
965 search tool. *J Mol Biol* 215:403–410.
- 966 93. Quinlan AR, Hall IM. 2010. BEDTools: A flexible suite of utilities for comparing  
967 genomic features. *Bioinformatics* 26:841–842.
- 968 94. El-Gebali S, Mistry J, Bateman A, Eddy SR, Luciani A, Potter SC, Qureshi M,  
969 Richardson LJ, Salazar GA, Smart A, Sonnhammer ELL, Hirsh L, Paladin L, Piovesan  
970 D, Tosatto SCE, Finn RD. 2019. The Pfam protein families database in 2019. *Nucleic  
971 Acids Res* 47:D427-D432.
- 972 95. Monat C, Tando N, Tranchant-Dubreuil C, Sabot F. 2016. LTRclassifier: a website for  
973 fast structural LTR retrotransposons classification in plants. *Mob Genet Elements*  
974 6:e1241050.
- 975 96. Miele V, Penel S, Duret L. 2011. Ultra-fast sequence clustering from similarity  
976 networks with SiLiX. *BMC Bioinformatics* 12:116.
- 977 97. Korber B. 2000. HIV signature and sequence variation analysis., p. 55–72. *In* Rodrigo,  
978 AG, Learn, GH (eds.), *Computational analysis of HIV molecular sequences*. Kluwer  
979 Academic Publishers, Dordrecht.
